# Supplementary material for: Prediction of Mutational Tolerance in HIV-1 Protease and Reverse Transcriptase Using Flexible Backbone Protein Design
Source: PubMed Central journal article supplement (PMC3426558; doi:10.1371/journal.pcbi.1002639), 2012-08-23
Supplement: pcbi.1002639.s004.pdf [file pcbi.1002639.s004.pdf]

**Figure S4:** Predicted and observed HIV-1 reverse transcriptase amino acid substitutions for the neutral model

|     | Computational Model<br><i>Neutral parameters</i> |                                                                | Stanford Database<br><i>Pre-inhibitor Treatment</i> |                                                              |
|-----|--------------------------------------------------|----------------------------------------------------------------|-----------------------------------------------------|--------------------------------------------------------------|
|     | % Non-Native                                     | Predicted Mutations                                            | % Non-Native                                        | Observed Mutations                                           |
| 1P  | 97.55                                            | L <sup>13</sup> Q <sup>69</sup> S <sup>13</sup> T <sup>2</sup> | 0                                                   | -                                                            |
| 2I  | 0.67                                             | V <sup>1</sup>                                                 | 0                                                   | -                                                            |
| 3S  | 0.02                                             | -                                                              | 0                                                   | -                                                            |
| 4P  | 0                                                | -                                                              | 0.5                                                 | -                                                            |
| 5I  | 15.89                                            | V <sup>16</sup>                                                | 0.5                                                 | V <sup>1</sup>                                               |
| 6E  | 96.57                                            | D <sup>96</sup>                                                | 7.8                                                 | D <sup>7</sup> K <sup>1</sup>                                |
| 7T  | 30.44                                            | P <sup>30</sup>                                                | 0.1                                                 | -                                                            |
| 8V  | 0.08                                             | -                                                              | 0.9                                                 | I <sup>1</sup>                                               |
| 9P  | 0.94                                             | Q <sup>1</sup>                                                 | 0                                                   | -                                                            |
| 10V | 0                                                | -                                                              | 0                                                   | -                                                            |
| 11K | 100                                              | T <sup>100</sup>                                               | 2.3                                                 | R <sup>2</sup>                                               |
| 12L | 0                                                | -                                                              | 0                                                   | -                                                            |
| 13K | 0                                                | -                                                              | 0                                                   | -                                                            |
| 14P | 0                                                | -                                                              | 0                                                   | -                                                            |
| 15G | 0                                                | -                                                              | 0                                                   | -                                                            |
| 16M | 99.95                                            | L <sup>16</sup> T <sup>84</sup>                                | 0                                                   | -                                                            |
| 17D | 0                                                | -                                                              | 0                                                   | -                                                            |
| 18G | 0                                                | -                                                              | 0                                                   | -                                                            |
| 19P | 0                                                | -                                                              | 0                                                   | -                                                            |
| 20K | 91.02                                            | N <sup>27</sup> R <sup>63</sup>                                | 9.8                                                 | R <sup>10</sup>                                              |
| 21V | 0.04                                             | -                                                              | 1.1                                                 | I <sup>1</sup>                                               |
| 22K | 6.82                                             | E <sup>1</sup> Q <sup>3</sup> R <sup>1</sup> T <sup>2</sup>    | 0.4                                                 | -                                                            |
| 23Q | 0                                                | -                                                              | 0                                                   | -                                                            |
| 24W | 100                                              | L <sup>95</sup> R <sup>3</sup> S <sup>1</sup>                  | 0                                                   | -                                                            |
| 25P | 0                                                | -                                                              | 0                                                   | -                                                            |
| 26L | 0                                                | -                                                              | 0.1                                                 | -                                                            |
| 27T | 5.95                                             | P <sup>6</sup>                                                 | 0.5                                                 | S <sup>1</sup>                                               |
| 28E | 0                                                | -                                                              | 0.8                                                 | A <sup>1</sup>                                               |
| 29E | 0.09                                             | -                                                              | 0                                                   | -                                                            |
| 30K | 16.10                                            | Q <sup>16</sup>                                                | 0.9                                                 | Q <sup>1</sup>                                               |
| 31I | 0.01                                             | -                                                              | 0.2                                                 | -                                                            |
| 32K | 26.09                                            | Q <sup>1</sup> R <sup>24</sup>                                 | 2.4                                                 | G <sup>1</sup> R <sup>1</sup>                                |
| 33A | 0                                                | -                                                              | 0                                                   | -                                                            |
| 34L | 0                                                | -                                                              | 0.9                                                 | T <sup>1</sup>                                               |
| 35V | 99.39                                            | E <sup>2</sup> I <sup>7</sup> L <sup>90</sup>                  | 27.4                                                | I <sup>15</sup> L <sup>4</sup> M <sup>2</sup> T <sup>6</sup> |
| 36E | 1.46                                             | K <sup>1</sup> Q <sup>1</sup>                                  | 3                                                   | D <sup>1</sup> N <sup>2</sup>                                |
| 37I | 0.13                                             | -                                                              | 1.9                                                 | F <sup>2</sup>                                               |
| 38C | NA                                               | NA                                                             | NA                                                  | NA                                                           |
| 39T | 86.42                                            | K <sup>54</sup> N <sup>24</sup> R <sup>8</sup>                 | 4.6                                                 | A <sup>3</sup> K <sup>1</sup>                                |
| 40E | 4.09                                             | K <sup>3</sup> Q <sup>1</sup>                                  | 0.5                                                 | D <sup>1</sup>                                               |
| 41M | 15.89                                            | L <sup>16</sup>                                                | 1.7                                                 | L <sup>2</sup>                                               |
| 42E | 0                                                | -                                                              | 0                                                   | -                                                            |
| 43K | 36.22                                            | E <sup>5</sup> N <sup>28</sup> Q <sup>1</sup> R <sup>2</sup>   | 0.8                                                 | -                                                            |
| 44E | 51.41                                            | D <sup>21</sup> K <sup>9</sup> Q <sup>21</sup>                 | 0.3                                                 | -                                                            |
| 45G | 0                                                | -                                                              | 0.1                                                 | -                                                            |
| 46K | 15.89                                            | R <sup>16</sup>                                                | 0.1                                                 | -                                                            |
| 47I | 0.13                                             | -                                                              | 0                                                   | -                                                            |
| 48S | 0.29                                             | -                                                              | 2.6                                                 | E <sup>1</sup> T <sup>2</sup>                                |
| 49K | 1.62                                             | R <sup>1</sup> T <sup>1</sup>                                  | 4.7                                                 | R <sup>5</sup>                                               |
| 50I | 3.03                                             | T <sup>2</sup> V <sup>2</sup>                                  | 1.4                                                 | V <sup>1</sup>                                               |

|      | Computational Model<br><i>Neutral parameters</i> |                                                 | Stanford Database<br><i>Pre-inhibitor Treatment</i> |                               |
|------|--------------------------------------------------|-------------------------------------------------|-----------------------------------------------------|-------------------------------|
|      | % Non-Native                                     | Predicted Mutations                             | % Non-Native                                        | Observed Mutations            |
| 51G  | 0                                                | -                                               | 0                                                   | -                             |
| 52P  | 0.02                                             | -                                               | 0                                                   | -                             |
| 53E  | 100                                              | D <sup>100</sup>                                | 0.6                                                 | D <sup>1</sup>                |
| 54N  | 100                                              | D <sup>97</sup> I <sup>3</sup>                  | 0                                                   | -                             |
| 55P  | 0.01                                             | -                                               | 0                                                   | -                             |
| 56Y  | 0                                                | -                                               | 0                                                   | -                             |
| 57N  | 69.71                                            | S <sup>70</sup>                                 | 0                                                   | -                             |
| 58T  | 1.53                                             | I <sup>2</sup>                                  | 0                                                   | -                             |
| 59P  | 0                                                | -                                               | 0                                                   | -                             |
| 60V  | 0.29                                             | -                                               | 11.6                                                | I <sup>12</sup>               |
| 61F  | 3.44                                             | Y <sup>3</sup>                                  | 0                                                   | -                             |
| 62A  | 73.49                                            | S <sup>12</sup> T <sup>1</sup> V <sup>61</sup>  | 0.2                                                 | -                             |
| 63I  | 0.13                                             | -                                               | 0                                                   | -                             |
| 64K  | 8.08                                             | N <sup>8</sup>                                  | 1.5                                                 | R <sup>2</sup>                |
| 65K  | 10.50                                            | E <sup>7</sup> N <sup>1</sup> Q <sup>1</sup>    | 0.1                                                 | -                             |
| 66K  | 100                                              | N <sup>100</sup>                                | 0                                                   | -                             |
| 67D  | 99.53                                            | G <sup>69</sup> N <sup>30</sup>                 | 0.7                                                 | N <sup>1</sup>                |
| 68S  | 96.83                                            | G <sup>89</sup> N <sup>7</sup> T <sup>1</sup>   | 4.2                                                 | G <sup>4</sup>                |
| 69T  | 99.98                                            | N <sup>100</sup>                                | 1.3                                                 | N <sup>1</sup> S <sup>1</sup> |
| 70K  | 99.82                                            | E <sup>12</sup> Q <sup>61</sup> T <sup>27</sup> | 0.4                                                 | -                             |
| 71W  | 0                                                | -                                               | 0                                                   | -                             |
| 72R  | 0                                                | -                                               | 0                                                   | -                             |
| 73K  | 100                                              | E <sup>2</sup> N <sup>98</sup>                  | 0                                                   | -                             |
| 74L  | 3.45                                             | V <sup>3</sup>                                  | 0.1                                                 | -                             |
| 75V  | 0                                                | -                                               | 0                                                   | -                             |
| 76D  | 0                                                | -                                               | 0                                                   | -                             |
| 77F  | 0                                                | -                                               | 0                                                   | -                             |
| 78R  | 0                                                | -                                               | 0                                                   | -                             |
| 79E  | 0                                                | -                                               | 0.2                                                 | -                             |
| 80L  | 0                                                | -                                               | 0                                                   | -                             |
| 81N  | 1.55                                             | D <sup>2</sup>                                  | 0                                                   | -                             |
| 82K  | 2.18                                             | N <sup>2</sup> R <sup>1</sup>                   | 0.4                                                 | -                             |
| 83R  | 0                                                | -                                               | 16.3                                                | K <sup>16</sup>               |
| 84T  | 0                                                | -                                               | 0                                                   | -                             |
| 85Q  | 0                                                | -                                               | 0                                                   | -                             |
| 86D  | 0.10                                             | -                                               | 1.1                                                 | E <sup>1</sup>                |
| 87F  | 0                                                | -                                               | 0                                                   | -                             |
| 88W  | 30.30                                            | S <sup>30</sup>                                 | 0                                                   | -                             |
| 89E  | 46.91                                            | D <sup>3</sup> K <sup>3</sup> Q <sup>40</sup>   | 0                                                   | -                             |
| 90V  | 57.07                                            | G <sup>43</sup> I <sup>14</sup>                 | 1.6                                                 | I <sup>2</sup>                |
| 91Q  | 12.55                                            | L <sup>13</sup>                                 | 0                                                   | -                             |
| 92L  | 0                                                | -                                               | 0                                                   | -                             |
| 93G  | 0                                                | -                                               | 0                                                   | -                             |
| 94I  | 99.65                                            | L <sup>10</sup> T <sup>90</sup>                 | 0                                                   | -                             |
| 95P  | 0                                                | -                                               | 0                                                   | -                             |
| 96H  | 0                                                | -                                               | 0                                                   | -                             |
| 97P  | 0                                                | -                                               | 0                                                   | -                             |
| 98A  | 100                                              | S <sup>100</sup>                                | 6.1                                                 | S <sup>6</sup>                |
| 99G  | 0                                                | -                                               | 0                                                   | -                             |
| 100L | 0                                                | -                                               | 0                                                   | -                             |

|      | Computational Model<br>Neutral parameters |                                                                                             | Stanford Database<br>Pre-inhibitor Treatment |                                                                             |
|------|-------------------------------------------|---------------------------------------------------------------------------------------------|----------------------------------------------|-----------------------------------------------------------------------------|
|      | % Non-Native                              | Predicted Mutations                                                                         | % Non-Native                                 | Observed Mutations                                                          |
| 101K | 0.28                                      | -                                                                                           | 1.7                                          | Q <sup>1</sup> R <sup>1</sup>                                               |
| 102K | 34.75                                     | E <sup>1</sup> N <sup>28</sup> Q <sup>5</sup>                                               | 5.1                                          | Q <sup>3</sup> R <sup>2</sup>                                               |
| 103K | 5.50                                      | Q <sup>1</sup> T <sup>4</sup>                                                               | 4.9                                          | N <sup>2</sup> R <sup>3</sup>                                               |
| 104K | 2.29                                      | N <sup>2</sup> T <sup>1</sup>                                                               | 2.5                                          | R <sup>2</sup>                                                              |
| 105S | 88.37                                     | F <sup>62</sup> Y <sup>27</sup>                                                             | 0.2                                          | -                                                                           |
| 106V | 0                                         | -                                                                                           | 1.7                                          | I <sup>2</sup>                                                              |
| 107T | 0                                         | -                                                                                           | 0.2                                          | -                                                                           |
| 108V | 0                                         | -                                                                                           | 0.3                                          | -                                                                           |
| 109L | 0                                         | -                                                                                           | 0                                            | -                                                                           |
| 110D | NA                                        | NA                                                                                          | NA                                           | NA                                                                          |
| 111V | 96.56                                     | I <sup>97</sup>                                                                             | 0.3                                          | -                                                                           |
| 112G | 31.07                                     | A <sup>1</sup> S <sup>30</sup>                                                              | 0                                            | -                                                                           |
| 113D | 69.72                                     | N <sup>70</sup>                                                                             | 0                                            | -                                                                           |
| 114A | 0                                         | -                                                                                           | 0                                            | -                                                                           |
| 115Y | 0.02                                      | -                                                                                           | 0                                            | -                                                                           |
| 116F | 99.94                                     | L <sup>100</sup>                                                                            | 0                                            | -                                                                           |
| 117S | 5.45                                      | L <sup>1</sup> T <sup>3</sup>                                                               | 0                                            | -                                                                           |
| 118V | 0                                         | -                                                                                           | 2.6                                          | I <sup>3</sup>                                                              |
| 119P | 0                                         | -                                                                                           | 0                                            | -                                                                           |
| 120L | 0                                         | -                                                                                           | 0                                            | -                                                                           |
| 121D | 0.13                                      | -                                                                                           | 5                                            | H <sup>3</sup> Y <sup>2</sup>                                               |
| 122K | 37.48                                     | E <sup>27</sup> Q <sup>5</sup> R <sup>5</sup>                                               | 31.9                                         | E <sup>27</sup> P <sup>3</sup> Q <sup>1</sup>                               |
| 123D | 3.01                                      | E <sup>2</sup> N <sup>2</sup>                                                               | 28.9                                         | E <sup>24</sup> G <sup>1</sup> N <sup>3</sup> S <sup>1</sup>                |
| 124F | 50.00                                     | Y <sup>50</sup>                                                                             | 0                                            | -                                                                           |
| 125R | 0                                         | -                                                                                           | 0                                            | -                                                                           |
| 126K | 0.55                                      | E <sup>1</sup>                                                                              | 0                                            | -                                                                           |
| 127Y | 15.89                                     | F <sup>16</sup>                                                                             | 0                                            | -                                                                           |
| 128T | 0                                         | -                                                                                           | 0                                            | -                                                                           |
| 129A | 0                                         | -                                                                                           | 0                                            | -                                                                           |
| 130F | 0                                         | -                                                                                           | 0                                            | -                                                                           |
| 131T | 0                                         | -                                                                                           | 0                                            | -                                                                           |
| 132I | 0.01                                      | -                                                                                           | 0.1                                          | -                                                                           |
| 133P | 0                                         | -                                                                                           | 0                                            | -                                                                           |
| 134S | 0                                         | -                                                                                           | 0                                            | -                                                                           |
| 135I | 58.52                                     | K <sup>2</sup> L <sup>18</sup> R <sup>3</sup> S <sup>2</sup> T <sup>3</sup> V <sup>31</sup> | 42.8                                         | L <sup>3</sup> M <sup>1</sup> R <sup>3</sup> T <sup>28</sup> V <sup>8</sup> |
| 136N | 0                                         | -                                                                                           | 0                                            | -                                                                           |
| 137N | 25.05                                     | H <sup>25</sup>                                                                             | 0                                            | -                                                                           |
| 138E | 12.74                                     | D <sup>12</sup>                                                                             | 2.1                                          | A <sup>2</sup>                                                              |
| 139T | 0.01                                      | -                                                                                           | 0.8                                          | -                                                                           |
| 140P | 0.16                                      | -                                                                                           | 0                                            | -                                                                           |
| 141G | 0                                         | -                                                                                           | 0                                            | -                                                                           |
| 142I | 6.20                                      | K <sup>4</sup> V <sup>1</sup>                                                               | 9.4                                          | T <sup>3</sup> V <sup>6</sup>                                               |
| 143R | 1.69                                      | I <sup>2</sup>                                                                              | 0.1                                          | -                                                                           |
| 144Y | 0                                         | -                                                                                           | 0                                            | -                                                                           |
| 145Q | 92.42                                     | R <sup>92</sup>                                                                             | 0                                            | -                                                                           |
| 146Y | 0.29                                      | -                                                                                           | 0                                            | -                                                                           |
| 147N | 0.67                                      | D <sup>1</sup>                                                                              | 0                                            | -                                                                           |
| 148V | 0                                         | -                                                                                           | 0                                            | -                                                                           |
| 149L | 0                                         | -                                                                                           | 0                                            | -                                                                           |
| 150P | 0                                         | -                                                                                           | 0                                            | -                                                                           |

|      | Computational Model<br>Neutral parameters |                                                                                              | Stanford Database<br>Pre-inhibitor Treatment |                                                                                           |
|------|-------------------------------------------|----------------------------------------------------------------------------------------------|----------------------------------------------|-------------------------------------------------------------------------------------------|
|      | % Non-Native                              | Predicted Mutations                                                                          | % Non-Native                                 | Observed Mutations                                                                        |
| 151Q | 99.87                                     | P <sup>100</sup>                                                                             | 0                                            | -                                                                                         |
| 152G | 0                                         | -                                                                                            | 0                                            | -                                                                                         |
| 153W | 0                                         | -                                                                                            | 0                                            | -                                                                                         |
| 154K | 0                                         | -                                                                                            | 0                                            | -                                                                                         |
| 155G | 0                                         | -                                                                                            | 0                                            | -                                                                                         |
| 156S | 99.87                                     | A <sup>100</sup>                                                                             | 0                                            | -                                                                                         |
| 157P | 1.80                                      | A <sup>2</sup>                                                                               | 0                                            | -                                                                                         |
| 158A | 0.01                                      | -                                                                                            | 1.7                                          | S <sup>2</sup>                                                                            |
| 159I | 0                                         | -                                                                                            | 0.2                                          | -                                                                                         |
| 160F | 0                                         | -                                                                                            | 0                                            | -                                                                                         |
| 161Q | 6.70                                      | E <sup>3</sup> L <sup>3</sup> R <sup>1</sup>                                                 | 0                                            | -                                                                                         |
| 162S | 33.36                                     | R <sup>4</sup> T <sup>29</sup>                                                               | 6.5                                          | A <sup>4</sup> Y <sup>2</sup>                                                             |
| 163S | 17.43                                     | I <sup>1</sup> N <sup>1</sup> T <sup>16</sup>                                                | 0.1                                          | -                                                                                         |
| 164M | 100                                       | L <sup>100</sup>                                                                             | 0                                            | -                                                                                         |
| 165T | 13.98                                     | K <sup>9</sup> R <sup>4</sup>                                                                | 3                                            | I <sup>3</sup>                                                                            |
| 166K | 0.52                                      | -                                                                                            | 7.2                                          | R <sup>7</sup>                                                                            |
| 167I | 0.02                                      | -                                                                                            | 0                                            | -                                                                                         |
| 168L | 0                                         | -                                                                                            | 0                                            | -                                                                                         |
| 169E | 0                                         | -                                                                                            | 5                                            | D <sup>5</sup>                                                                            |
| 170P | 98.54                                     | L <sup>1</sup> Q <sup>94</sup> R <sup>3</sup>                                                | 0                                            | -                                                                                         |
| 171F | 0                                         | -                                                                                            | 0.6                                          | Y <sup>1</sup>                                                                            |
| 172R | 1.70                                      | I <sup>2</sup>                                                                               | 0.2                                          | -                                                                                         |
| 173K | 2.28                                      | N <sup>1</sup> Q <sup>2</sup>                                                                | 7.4                                          | A <sup>1</sup> E <sup>3</sup> N <sup>1</sup> Q <sup>1</sup> R <sup>1</sup> T <sup>1</sup> |
| 174Q | 1.74                                      | E <sup>1</sup> K <sup>1</sup>                                                                | 7.2                                          | E <sup>2</sup> H <sup>1</sup> K <sup>3</sup> R <sup>1</sup>                               |
| 175N | 15.93                                     | H <sup>16</sup>                                                                              | 1                                            | H <sup>1</sup>                                                                            |
| 176P | 0.12                                      | -                                                                                            | 0.5                                          | -                                                                                         |
| 177D | 0.06                                      | -                                                                                            | 21.4                                         | E <sup>20</sup> G <sup>1</sup> N <sup>1</sup>                                             |
| 178I | 15.89                                     | V <sup>16</sup>                                                                              | 15.5                                         | L <sup>5</sup> M <sup>9</sup> V <sup>1</sup>                                              |
| 179V | 0.10                                      | -                                                                                            | 6.1                                          | D <sup>2</sup> I <sup>4</sup>                                                             |
| 180I | 0.39                                      | -                                                                                            | 0.7                                          | V <sup>1</sup>                                                                            |
| 181Y | 0.07                                      | -                                                                                            | 0                                            | -                                                                                         |
| 182Q | 94.15                                     | L <sup>94</sup>                                                                              | 0                                            | -                                                                                         |
| 183Y | 50.01                                     | F <sup>50</sup>                                                                              | 0                                            | -                                                                                         |
| 184M | 0.15                                      | -                                                                                            | 1                                            | V <sup>1</sup>                                                                            |
| 185D | NA                                        | NA                                                                                           | NA                                           | NA                                                                                        |
| 186D | NA                                        | NA                                                                                           | NA                                           | NA                                                                                        |
| 187L | 0                                         | -                                                                                            | 0                                            | -                                                                                         |
| 188Y | 69.71                                     | F <sup>70</sup>                                                                              | 0.1                                          | -                                                                                         |
| 189V | 0                                         | -                                                                                            | 1                                            | I <sup>1</sup>                                                                            |
| 190G | 0.30                                      | -                                                                                            | 0.2                                          | -                                                                                         |
| 191S | 0                                         | -                                                                                            | 0                                            | -                                                                                         |
| 192D | 0.30                                      | -                                                                                            | 0.1                                          | -                                                                                         |
| 193L | 7.59                                      | S <sup>8</sup>                                                                               | 0                                            | -                                                                                         |
| 194E | 96.13                                     | D <sup>47</sup> K <sup>2</sup> Q <sup>47</sup>                                               | 0.3                                          | -                                                                                         |
| 195I | 100                                       | K <sup>30</sup> L <sup>2</sup> N <sup>2</sup> R <sup>30</sup> S <sup>6</sup> T <sup>30</sup> | 1.3                                          | L <sup>1</sup>                                                                            |
| 196G | 100                                       | D <sup>2</sup> E <sup>98</sup>                                                               | 14.9                                         | E <sup>14</sup>                                                                           |
| 197Q | 28.38                                     | K <sup>14</sup> L <sup>1</sup> R <sup>14</sup>                                               | 3.4                                          | E <sup>1</sup> K <sup>1</sup>                                                             |
| 198H | 0                                         | -                                                                                            | 0                                            | -                                                                                         |
| 199R | 0                                         | -                                                                                            | 0                                            | -                                                                                         |
| 200T | 92.64                                     | K <sup>90</sup> N <sup>1</sup> R <sup>1</sup>                                                | 30.5                                         | A <sup>18</sup> E <sup>2</sup> I <sup>9</sup> V <sup>1</sup>                              |

|      | Computational Model<br><i>Neutral parameters</i> |                                                              | Stanford Database<br><i>Pre-inhibitor Treatment</i> |                                                                                                                          |
|------|--------------------------------------------------|--------------------------------------------------------------|-----------------------------------------------------|--------------------------------------------------------------------------------------------------------------------------|
|      | % Non-Native                                     | Predicted Mutations                                          | % Non-Native                                        | Observed Mutations                                                                                                       |
| 201K | 4.24                                             | N <sup>3</sup> Q <sup>1</sup>                                | 0.3                                                 | -                                                                                                                        |
| 202I | 100                                              | V <sup>100</sup>                                             | 9.4                                                 | V <sup>9</sup>                                                                                                           |
| 203E | 0.96                                             | D <sup>1</sup>                                               | 1                                                   | D <sup>1</sup>                                                                                                           |
| 204E | 0.01                                             | -                                                            | 4                                                   | D <sup>1</sup> K <sup>2</sup> Q <sup>1</sup>                                                                             |
| 205L | 0                                                | -                                                            | 0                                                   | -                                                                                                                        |
| 206R | 0.01                                             | -                                                            | 0                                                   | -                                                                                                                        |
| 207Q | 7.81                                             | E <sup>8</sup>                                               | 24.7                                                | A <sup>2</sup> D <sup>1</sup> E <sup>17</sup> G <sup>1</sup> H <sup>1</sup> K <sup>2</sup> N <sup>1</sup> R <sup>1</sup> |
| 208H | 30.47                                            | D <sup>30</sup>                                              | 0.2                                                 | -                                                                                                                        |
| 209L | 0                                                | -                                                            | 0                                                   | -                                                                                                                        |
| 210L | 0.37                                             | -                                                            | 1.5                                                 | F <sup>1</sup> W <sup>1</sup>                                                                                            |
| 211R | 0.67                                             | K <sup>1</sup>                                               | 52.1                                                | A <sup>1</sup> G <sup>4</sup> K <sup>43</sup> Q <sup>2</sup> S <sup>2</sup> T <sup>1</sup>                               |
| 212W | 99.98                                            | R <sup>99</sup> S <sup>1</sup>                               | 0                                                   | -                                                                                                                        |
| 213G | 0                                                | -                                                            | 0                                                   | -                                                                                                                        |
| 214F | 67.06                                            | I <sup>33</sup> L <sup>33</sup> V <sup>1</sup>               | 14.3                                                | L <sup>14</sup>                                                                                                          |
| 215T | 2.46                                             | I <sup>1</sup> R <sup>2</sup>                                | 2.5                                                 | D <sup>1</sup> S <sup>1</sup>                                                                                            |
| 216T | 0.13                                             | -                                                            | 0                                                   | -                                                                                                                        |
| 217P | 0                                                | -                                                            | 0                                                   | -                                                                                                                        |
| 218D | 0                                                | -                                                            | 0.1                                                 | -                                                                                                                        |
| 219K | 7.60                                             | E <sup>8</sup>                                               | 0.5                                                 | -                                                                                                                        |
| 220K | 72.17                                            | N <sup>64</sup> Q <sup>2</sup> T <sup>5</sup>                | 0                                                   | -                                                                                                                        |
| 221H | 100                                              | D <sup>16</sup> N <sup>83</sup> P <sup>1</sup>               | 0.1                                                 | -                                                                                                                        |
| 222Q | 3.45                                             | L <sup>3</sup>                                               | 0                                                   | -                                                                                                                        |
| 223K | 99.99                                            | T <sup>100</sup>                                             | 0                                                   | -                                                                                                                        |
| 224E | 99.98                                            | D <sup>30</sup> G <sup>70</sup>                              | 0.4                                                 | -                                                                                                                        |
| 225P | 0                                                | -                                                            | 0.1                                                 | -                                                                                                                        |
| 226P | 0                                                | -                                                            | 0                                                   | -                                                                                                                        |
| 227F | 99.87                                            | Y <sup>100</sup>                                             | 0                                                   | -                                                                                                                        |
| 228L | 58.57                                            | I <sup>8</sup> Q <sup>41</sup> R <sup>8</sup> V <sup>1</sup> | 0.3                                                 | -                                                                                                                        |
| 229W | 0                                                | -                                                            | 0                                                   | -                                                                                                                        |
| 230M | 43.44                                            | L <sup>25</sup> R <sup>19</sup>                              | 0                                                   | -                                                                                                                        |
| 231G | 0                                                | -                                                            | 0                                                   | -                                                                                                                        |
| 232Y | 0.13                                             | -                                                            | 0                                                   | -                                                                                                                        |
| 233E | 69.85                                            | D <sup>69</sup>                                              | 0                                                   | -                                                                                                                        |
| 234L | 0.01                                             | -                                                            | 0                                                   | -                                                                                                                        |
| 235H | 0.67                                             | Y <sup>1</sup>                                               | 0                                                   | -                                                                                                                        |
| 236P | 0                                                | -                                                            | 0                                                   | -                                                                                                                        |
| 237D | 0.07                                             | -                                                            | 0.2                                                 | -                                                                                                                        |
| 238K | 84.55                                            | N <sup>82</sup> Q <sup>1</sup> R <sup>1</sup>                | 0.7                                                 | R <sup>1</sup>                                                                                                           |
| 239W | 0                                                | -                                                            | 0                                                   | -                                                                                                                        |
| 240T | 0.73                                             | S <sup>1</sup>                                               | 0                                                   | -                                                                                                                        |
| 241V | 99.71                                            | D <sup>100</sup>                                             | 0.2                                                 | -                                                                                                                        |
| 242Q | 0.13                                             | -                                                            | 0                                                   | -                                                                                                                        |
| 243P | 0                                                | -                                                            | 0.5                                                 | -                                                                                                                        |
| 244I | 0.68                                             | V <sup>1</sup>                                               | 1.2                                                 | V <sup>1</sup>                                                                                                           |
| 245V | 69.88                                            | D <sup>69</sup>                                              | 38                                                  | E <sup>11</sup> I <sup>2</sup> K <sup>6</sup> L <sup>1</sup> M <sup>11</sup> Q <sup>3</sup> T <sup>2</sup>               |
| 246L | 0                                                | -                                                            | 0                                                   | -                                                                                                                        |
| 247P | 0                                                | -                                                            | 0                                                   | -                                                                                                                        |
| 248E | 100                                              | D <sup>100</sup>                                             | 5                                                   | D <sup>4</sup> N <sup>1</sup>                                                                                            |
| 249K | 27.63                                            | Q <sup>24</sup> R <sup>1</sup> T <sup>2</sup>                | 1.2                                                 | Q <sup>1</sup>                                                                                                           |
| 250D | 0.02                                             | N <sup>3</sup> Q <sup>1</sup>                                | 4.8                                                 | E <sup>5</sup>                                                                                                           |

|      | Computational Model<br><i>Neutral parameters</i> |                                                 | Stanford Database<br><i>Pre-inhibitor Treatment</i> |                                                                                             |
|------|--------------------------------------------------|-------------------------------------------------|-----------------------------------------------------|---------------------------------------------------------------------------------------------|
|      | % Non-Native                                     | Predicted Mutations                             | % Non-Native                                        | Observed Mutations                                                                          |
| 251S | 99.87                                            | N <sup>100</sup>                                | 1.6                                                 | I <sup>1</sup>                                                                              |
| 252W | 0                                                | -                                               | 0                                                   | -                                                                                           |
| 253T | 0                                                | -                                               | 0                                                   | -                                                                                           |
| 254V | 0.30                                             | -                                               | 0                                                   | -                                                                                           |
| 255N | 69.73                                            | D <sup>70</sup>                                 | 0                                                   | -                                                                                           |
| 256D | 0.05                                             | -                                               | 0                                                   | -                                                                                           |
| 257I | 99.71                                            | L <sup>100</sup>                                | 0.7                                                 | L <sup>1</sup>                                                                              |
| 258Q | 0.74                                             | L <sup>1</sup>                                  | 0                                                   | -                                                                                           |
| 259K | 87.60                                            | E <sup>66</sup> N <sup>16</sup> Q <sup>5</sup>  | 0                                                   | -                                                                                           |
| 260L | 0                                                | -                                               | 0                                                   | -                                                                                           |
| 261V | 80.77                                            | I <sup>77</sup> L <sup>4</sup>                  | 0.1                                                 | -                                                                                           |
| 262G | 100                                              | A <sup>100</sup>                                | 0                                                   | -                                                                                           |
| 263K | 6.74                                             | E <sup>3</sup> Q <sup>3</sup>                   | 0                                                   | -                                                                                           |
| 264L | 0                                                | -                                               | 0                                                   | -                                                                                           |
| 265N | 98.48                                            | D <sup>98</sup>                                 | 0                                                   | -                                                                                           |
| 266W | 5.86                                             | L <sup>6</sup>                                  | 0                                                   | -                                                                                           |
| 267A | 0                                                | -                                               | 0                                                   | -                                                                                           |
| 268S | 0                                                | -                                               | 0                                                   | -                                                                                           |
| 269Q | 1.94                                             | L <sup>1</sup> R <sup>1</sup>                   | 0                                                   | -                                                                                           |
| 270I | 0.13                                             | -                                               | 0                                                   | -                                                                                           |
| 271Y | 3.44                                             | F <sup>3</sup>                                  | 0.2                                                 | -                                                                                           |
| 272A | 100                                              | P <sup>100</sup>                                | 53.4                                                | G <sup>1</sup> P <sup>45</sup> S <sup>6</sup> T <sup>2</sup>                                |
| 273G | 0                                                | -                                               | 0                                                   | -                                                                                           |
| 274I | 4.87                                             | L <sup>1</sup> V <sup>3</sup>                   | 0.1                                                 | -                                                                                           |
| 275K | 1.83                                             | R <sup>1</sup> T <sup>1</sup>                   | 2.1                                                 | Q <sup>1</sup> R <sup>1</sup>                                                               |
| 276V | 100                                              | D <sup>100</sup>                                | 4.7                                                 | I <sup>4</sup> T <sup>1</sup>                                                               |
| 277K | 99.90                                            | E <sup>100</sup>                                | 40.7                                                | R <sup>41</sup>                                                                             |
| 278Q | 92.41                                            | E <sup>92</sup>                                 | 5.1                                                 | E <sup>3</sup> H <sup>2</sup>                                                               |
| 279L | 0                                                | -                                               | 0                                                   | -                                                                                           |
| 280C | NA                                               | NA                                              | NA                                                  | NA                                                                                          |
| 281K | 0.13                                             | -                                               | 5.7                                                 | R <sup>6</sup>                                                                              |
| 282L | 0                                                | -                                               | 0                                                   | -                                                                                           |
| 283L | 0                                                | -                                               | 6.2                                                 | I <sup>6</sup>                                                                              |
| 284R | 4.50                                             | K <sup>4</sup>                                  | 1.8                                                 | K <sup>2</sup>                                                                              |
| 285G | 0                                                | -                                               | 0                                                   | -                                                                                           |
| 286T | 2.09                                             | N <sup>2</sup>                                  | 30.8                                                | A <sup>29</sup> P <sup>1</sup>                                                              |
| 287K | 32.22                                            | N <sup>2</sup> Q <sup>13</sup> T <sup>17</sup>  | 0.2                                                 | -                                                                                           |
| 288A | 98.64                                            | D <sup>22</sup> P <sup>67</sup> S <sup>10</sup> | 9.3                                                 | S <sup>8</sup> T <sup>1</sup>                                                               |
| 289L | 0                                                | -                                               | 0                                                   | -                                                                                           |
| 290T | 0.03                                             | -                                               | 0                                                   | -                                                                                           |
| 291E | 7.76                                             | K <sup>8</sup>                                  | 3.6                                                 | D <sup>4</sup>                                                                              |
| 292V | 3.56                                             | I <sup>3</sup>                                  | 9.5                                                 | I <sup>10</sup>                                                                             |
| 293I | 98.47                                            | V <sup>98</sup>                                 | 55.3                                                | V <sup>55</sup>                                                                             |
| 294P | 0                                                | -                                               | 10.6                                                | A <sup>1</sup> Q <sup>3</sup> S <sup>2</sup> T <sup>5</sup>                                 |
| 295L | 0.29                                             | -                                               | 0.2                                                 | -                                                                                           |
| 296T | 3.44                                             | S <sup>3</sup>                                  | 1.2                                                 | S <sup>1</sup>                                                                              |
| 297E | 3.29                                             | K <sup>1</sup> Q <sup>1</sup>                   | 43.2                                                | A <sup>14</sup> K <sup>19</sup> Q <sup>1</sup> R <sup>4</sup> T <sup>2</sup> V <sup>2</sup> |
| 298E | 0.87                                             | -                                               | 0.6                                                 | A <sup>1</sup>                                                                              |
| 299A | 0                                                | -                                               | 0                                                   | -                                                                                           |
| 300E | 16.09                                            | Q <sup>16</sup>                                 | 0.4                                                 | -                                                                                           |

|      | Computational Model<br><i>Neutral parameters</i> |                                               | Stanford Database<br><i>Pre-inhibitor Treatment</i> |                                                                                            |
|------|--------------------------------------------------|-----------------------------------------------|-----------------------------------------------------|--------------------------------------------------------------------------------------------|
|      | % Non-Native                                     | Predicted Mutations                           | % Non-Native                                        | Observed Mutations                                                                         |
| 301L | 98.59                                            | Q <sup>7</sup> R <sup>91</sup>                | 2                                                   | I <sup>2</sup>                                                                             |
| 302E | 0                                                | -                                             | 0.3                                                 | -                                                                                          |
| 303L | 55.05                                            | F <sup>45</sup> I <sup>2</sup> R <sup>8</sup> | 0                                                   | -                                                                                          |
| 304A | 54.33                                            | D <sup>9</sup> E <sup>46</sup>                | 0.8                                                 | E <sup>1</sup>                                                                             |
| 305E | 0.09                                             | -                                             | 0                                                   | -                                                                                          |
| 306N | 0                                                | -                                             | 0                                                   | -                                                                                          |
| 307R | 3.56                                             | K <sup>3</sup>                                | 0.1                                                 | -                                                                                          |
| 308E | 3.69                                             | D <sup>3</sup>                                | 0                                                   | -                                                                                          |
| 309I | 0.01                                             | -                                             | 0.2                                                 | -                                                                                          |
| 310L | 0                                                | -                                             | 0.5                                                 | I <sup>1</sup>                                                                             |
| 311K | 10.60                                            | E <sup>3</sup> Q <sup>7</sup>                 | 8.7                                                 | R <sup>9</sup>                                                                             |
| 312E | 82.19                                            | D <sup>41</sup> G <sup>41</sup>               | 7                                                   | K <sup>2</sup> N <sup>1</sup> Q <sup>1</sup> T <sup>2</sup> V <sup>1</sup>                 |
| 313P | 0                                                | -                                             | 1.6                                                 | Q <sup>1</sup> T <sup>1</sup>                                                              |
| 314V | 0.06                                             | -                                             | 0.2                                                 | -                                                                                          |
| 315H | 100                                              | D <sup>97</sup> N <sup>2</sup> Y <sup>1</sup> | 0.1                                                 | -                                                                                          |
| 316G | 0                                                | -                                             | 0                                                   | -                                                                                          |
| 317V | 0.67                                             | D <sup>1</sup>                                | 7.1                                                 | A <sup>7</sup>                                                                             |
| 318Y | 1.54                                             | F <sup>2</sup>                                | 0                                                   | -                                                                                          |
| 319Y | 0.17                                             | -                                             | 0.2                                                 | -                                                                                          |
| 320D | 0                                                | -                                             | 0.2                                                 | -                                                                                          |
| 321P | 0                                                | -                                             | 0.5                                                 | S <sup>1</sup>                                                                             |
| 322S | 1.53                                             | T <sup>2</sup>                                | 9.9                                                 | A <sup>2</sup> T <sup>8</sup>                                                              |
| 323K | 0.35                                             | -                                             | 0.1                                                 | -                                                                                          |
| 324D | 0.01                                             | -                                             | 7.1                                                 | E <sup>6</sup> P <sup>1</sup>                                                              |
| 325L | 0                                                | -                                             | 0.7                                                 | I <sup>1</sup>                                                                             |
| 326I | 38.50                                            | F <sup>12</sup> V <sup>27</sup>               | 16.1                                                | V <sup>16</sup>                                                                            |
| 327A | 0.68                                             | S <sup>1</sup>                                | 1.6                                                 | V <sup>2</sup>                                                                             |
| 328E | 0                                                | -                                             | 1                                                   | D <sup>1</sup>                                                                             |
| 329I | 0.02                                             | -                                             | 23                                                  | L <sup>15</sup> V <sup>8</sup>                                                             |
| 330Q | 0.02                                             | -                                             | 0                                                   | -                                                                                          |
| 331K | 0                                                | -                                             | 0.1                                                 | -                                                                                          |
| 332Q | 3.60                                             | L <sup>3</sup>                                | 0                                                   | -                                                                                          |
| 333G | 0                                                | -                                             | 8.2                                                 | D <sup>1</sup> E <sup>7</sup>                                                              |
| 334Q | 0.69                                             | -                                             | 32.8                                                | D <sup>1</sup> E <sup>6</sup> H <sup>5</sup> L <sup>16</sup> N <sup>2</sup> Y <sup>2</sup> |
| 335G | 0                                                | -                                             | 3.8                                                 | D <sup>3</sup> S <sup>1</sup>                                                              |
| 336Q | 1.85                                             | E <sup>2</sup>                                | 0                                                   | -                                                                                          |
| 337W | 0                                                | -                                             | 0                                                   | -                                                                                          |
| 338T | 0                                                | -                                             | 2.7                                                 | S <sup>3</sup>                                                                             |
| 339Y | 0                                                | -                                             | 0.2                                                 | -                                                                                          |
| 340Q | 99.33                                            | R <sup>99</sup>                               | 0                                                   | -                                                                                          |
| 341I | 0                                                | -                                             | 1.3                                                 | F <sup>1</sup> V <sup>1</sup>                                                              |
| 342Y | 0                                                | -                                             | 1.1                                                 | F <sup>1</sup>                                                                             |
| 343Q | 0                                                | -                                             | 0.1                                                 | -                                                                                          |
| 344E | 50.20                                            | V <sup>50</sup>                               | 0.9                                                 | D <sup>1</sup>                                                                             |
| 345P | 0.02                                             | -                                             | 2.8                                                 | Q <sup>2</sup>                                                                             |
| 346F | 31.04                                            | S <sup>1</sup> Y <sup>30</sup>                | 5.4                                                 | H <sup>1</sup> Y <sup>5</sup>                                                              |
| 347K | 0.78                                             | N <sup>1</sup>                                | 0.5                                                 | -                                                                                          |
| 348N | 34.09                                            | D <sup>29</sup> S <sup>5</sup>                | 0.3                                                 | -                                                                                          |
| 349L | 0                                                | -                                             | 0                                                   | -                                                                                          |
| 350K | 92.51                                            | M <sup>91</sup> R <sup>1</sup>                | 0.4                                                 | -                                                                                          |

|      | Computational Model<br><i>Neutral parameters</i> |                                                                              | Stanford Database<br><i>Pre-inhibitor Treatment</i> |                                                                                                                         |
|------|--------------------------------------------------|------------------------------------------------------------------------------|-----------------------------------------------------|-------------------------------------------------------------------------------------------------------------------------|
|      | % Non-Native                                     | Predicted Mutations                                                          | % Non-Native                                        | Observed Mutations                                                                                                      |
| 351T | 0                                                | -                                                                            | 0                                                   | -                                                                                                                       |
| 352G | 0                                                | -                                                                            | 0                                                   | -                                                                                                                       |
| 353K | 99.33                                            | T <sup>99</sup>                                                              | 0                                                   | -                                                                                                                       |
| 354Y | 0.02                                             | -                                                                            | 0                                                   | -                                                                                                                       |
| 355A | 100                                              | D <sup>89</sup> T <sup>7</sup> V <sup>3</sup>                                | 2.3                                                 | G <sup>1</sup> T <sup>1</sup>                                                                                           |
| 356R | 5.89                                             | G <sup>6</sup>                                                               | 13.3                                                | K <sup>13</sup>                                                                                                         |
| 357M | 100                                              | I <sup>5</sup> K <sup>5</sup> R <sup>63</sup> T <sup>21</sup> V <sup>5</sup> | 30.1                                                | A <sup>1</sup> I <sup>2</sup> K <sup>3</sup> R <sup>2</sup> T <sup>20</sup> V <sup>2</sup>                              |
| 358R | 99.62                                            | G <sup>57</sup> K <sup>43</sup>                                              | 5.3                                                 | K <sup>5</sup>                                                                                                          |
| 359G | 0                                                | -                                                                            | 8.8                                                 | S <sup>9</sup>                                                                                                          |
| 360A | 99.71                                            | D <sup>1</sup> S <sup>99</sup>                                               | 14.4                                                | T <sup>14</sup> V <sup>1</sup>                                                                                          |
| 361H | 99.81                                            | D <sup>86</sup> N <sup>7</sup> Y <sup>7</sup>                                | 0                                                   | -                                                                                                                       |
| 362T | 4.53                                             | N <sup>1</sup> S <sup>3</sup>                                                | 0                                                   | -                                                                                                                       |
| 363N | 0.23                                             | -                                                                            | 0                                                   | -                                                                                                                       |
| 364D | 0                                                | -                                                                            | 0.6                                                 | E <sup>1</sup>                                                                                                          |
| 365V | 0.08                                             | -                                                                            | 3.3                                                 | I <sup>3</sup>                                                                                                          |
| 366K | 2.03                                             | E <sup>1</sup> R <sup>1</sup>                                                | 10                                                  | R <sup>10</sup>                                                                                                         |
| 367Q | 92.42                                            | E <sup>92</sup>                                                              | 0.6                                                 | L <sup>1</sup>                                                                                                          |
| 368L | 0                                                | -                                                                            | 0                                                   | -                                                                                                                       |
| 369T | 7.59                                             | A <sup>8</sup>                                                               | 6.2                                                 | A <sup>4</sup> V <sup>1</sup>                                                                                           |
| 370E | 0.01                                             | -                                                                            | 1.9                                                 | D <sup>1</sup>                                                                                                          |
| 371A | 0.08                                             | -                                                                            | 5.5                                                 | V <sup>5</sup>                                                                                                          |
| 372V | 0                                                | -                                                                            | 0                                                   | -                                                                                                                       |
| 373Q | 9.78                                             | E <sup>10</sup>                                                              | 0.6                                                 | H <sup>1</sup>                                                                                                          |
| 374K | 75.24                                            | R <sup>75</sup>                                                              | 0.8                                                 | R <sup>1</sup>                                                                                                          |
| 375I | 0                                                | -                                                                            | 6.3                                                 | V <sup>5</sup>                                                                                                          |
| 376A | 0.06                                             | -                                                                            | 33.8                                                | S <sup>6</sup> T <sup>24</sup> V <sup>3</sup>                                                                           |
| 377T | 99.87                                            | I <sup>58</sup> K <sup>33</sup> R <sup>8</sup>                               | 17.2                                                | I <sup>2</sup> K <sup>1</sup> L <sup>3</sup> M <sup>4</sup> Q <sup>4</sup> R <sup>1</sup> S <sup>1</sup> V <sup>1</sup> |
| 378E | 0                                                | -                                                                            | 0                                                   | -                                                                                                                       |
| 379S | 0                                                | -                                                                            | 6.9                                                 | G <sup>7</sup>                                                                                                          |
| 380I | 0.01                                             | -                                                                            | 0.4                                                 | -                                                                                                                       |
| 381V | 0.06                                             | -                                                                            | 4.4                                                 | I <sup>4</sup>                                                                                                          |
| 382I | 0.17                                             | -                                                                            | 0.8                                                 | -                                                                                                                       |
| 383W | 0.06                                             | -                                                                            | 0                                                   | -                                                                                                                       |
| 384G | 0                                                | -                                                                            | 0                                                   | -                                                                                                                       |
| 385K | 64                                               | R <sup>63</sup> T <sup>1</sup>                                               | 4.4                                                 | R <sup>4</sup>                                                                                                          |
| 386T | 1.22                                             | P <sup>1</sup>                                                               | 18.7                                                | A <sup>1</sup> I <sup>16</sup> V <sup>1</sup>                                                                           |
| 387P | 0                                                | -                                                                            | 0                                                   | -                                                                                                                       |
| 388K | 0.02                                             | -                                                                            | 1                                                   | R <sup>1</sup>                                                                                                          |
| 389F | 0                                                | -                                                                            | 0                                                   | -                                                                                                                       |
| 390K | 0                                                | -                                                                            | 52.2                                                | R <sup>52</sup>                                                                                                         |
| 391L | 0                                                | -                                                                            | 0.3                                                 | -                                                                                                                       |
| 392P | 0                                                | -                                                                            | 0                                                   | -                                                                                                                       |
| 393I | 0                                                | -                                                                            | 0.2                                                 | -                                                                                                                       |
| 394Q | 0.55                                             | -                                                                            | 0.7                                                 | -                                                                                                                       |
| 395K | 1.32                                             | R <sup>1</sup>                                                               | 3.9                                                 | R <sup>4</sup>                                                                                                          |
| 396E | 30.40                                            | D <sup>30</sup>                                                              | 1.4                                                 | D <sup>1</sup>                                                                                                          |
| 397T | 0.39                                             | -                                                                            | 0.5                                                 | -                                                                                                                       |
| 398W | 0                                                | -                                                                            | 0                                                   | -                                                                                                                       |
| 399E | 69.81                                            | Q <sup>69</sup>                                                              | 13.6                                                | D <sup>14</sup>                                                                                                         |
| 400A | 99.93                                            | D <sup>41</sup> E <sup>1</sup> S <sup>18</sup> T <sup>41</sup>               | 50                                                  | I <sup>2</sup> L <sup>1</sup> S <sup>6</sup> T <sup>40</sup>                                                            |

|      | Computational Model<br><i>Neutral parameters</i> |                                                              | Stanford Database<br><i>Pre-inhibitor Treatment</i> |                                                                                                            |
|------|--------------------------------------------------|--------------------------------------------------------------|-----------------------------------------------------|------------------------------------------------------------------------------------------------------------|
|      | % Non-Native                                     | Predicted Mutations                                          | % Non-Native                                        | Observed Mutations                                                                                         |
| 401W | 0                                                | -                                                            | 0                                                   | -                                                                                                          |
| 402W | 0                                                | -                                                            | 0                                                   | -                                                                                                          |
| 403T | 98.48                                            | K <sup>98</sup>                                              | 24.7                                                | A <sup>2</sup> I <sup>6</sup> L <sup>1</sup> M <sup>12</sup> S <sup>2</sup> V <sup>1</sup>                 |
| 404E | 12.59                                            | D <sup>3</sup> Q <sup>9</sup>                                | 11.6                                                | D <sup>12</sup>                                                                                            |
| 405Y | 0                                                | -                                                            | 1.2                                                 | H <sup>1</sup>                                                                                             |
| 406W | 0                                                | -                                                            | 0                                                   | -                                                                                                          |
| 407Q | 0.03                                             | -                                                            | 0                                                   | -                                                                                                          |
| 408A | 0                                                | -                                                            | 0                                                   | -                                                                                                          |
| 409T | 11.06                                            | N <sup>6</sup> S <sup>6</sup>                                | 0                                                   | -                                                                                                          |
| 410W | 99.71                                            | S <sup>99</sup>                                              | 0                                                   | -                                                                                                          |
| 411I | 3.45                                             | V <sup>3</sup>                                               | 1                                                   | V <sup>1</sup>                                                                                             |
| 412P | 0                                                | -                                                            | 0                                                   | -                                                                                                          |
| 413E | 1.54                                             | D <sup>2</sup>                                               | 0.9                                                 | D <sup>1</sup>                                                                                             |
| 414W | 0                                                | -                                                            | 0                                                   | -                                                                                                          |
| 415E | 1.55                                             | V <sup>2</sup>                                               | 0                                                   | -                                                                                                          |
| 416F | 0                                                | -                                                            | 1                                                   | Y <sup>1</sup>                                                                                             |
| 417V | 98.84                                            | D <sup>99</sup>                                              | 1.6                                                 | I <sup>1</sup> T <sup>1</sup>                                                                              |
| 418N | 99.49                                            | D <sup>99</sup>                                              | 0.6                                                 | S <sup>1</sup>                                                                                             |
| 419T | 25.27                                            | I <sup>25</sup> N <sup>1</sup>                               | 0                                                   | -                                                                                                          |
| 420P | 0                                                | -                                                            | 0.2                                                 | -                                                                                                          |
| 421P | 0                                                | -                                                            | 0.2                                                 | -                                                                                                          |
| 422L | 0                                                | -                                                            | 0                                                   | -                                                                                                          |
| 423V | 0                                                | -                                                            | 0                                                   | -                                                                                                          |
| 424K | 99.54                                            | N <sup>91</sup> Q <sup>1</sup> R <sup>4</sup> T <sup>3</sup> | 0                                                   | -                                                                                                          |
| 425L | 0                                                | -                                                            | 0                                                   | -                                                                                                          |
| 426W | 0                                                | -                                                            | 0                                                   | -                                                                                                          |
| 427Y | 0                                                | -                                                            | 0                                                   | -                                                                                                          |
| 428Q | 1.66                                             | E <sup>2</sup>                                               | 0.2                                                 | -                                                                                                          |
| 429L | 3.45                                             | I <sup>3</sup>                                               | 0                                                   | -                                                                                                          |
| 430E | 69.71                                            | Q <sup>70</sup>                                              | 0                                                   | -                                                                                                          |
| 431K | 47.46                                            | E <sup>30</sup> Q <sup>17</sup>                              | 4.9                                                 | R <sup>1</sup> T <sup>3</sup>                                                                              |
| 432E | 7.62                                             | Q <sup>8</sup>                                               | 10.1                                                | D <sup>10</sup>                                                                                            |
| 433P | 0                                                | -                                                            | 0                                                   | -                                                                                                          |
| 434I | 0.67                                             | V <sup>1</sup>                                               | 0.4                                                 | -                                                                                                          |
| 435V | 100                                              | D <sup>100</sup>                                             | 40.1                                                | A <sup>12</sup> E <sup>7</sup> I <sup>15</sup> L <sup>3</sup> M <sup>1</sup> P <sup>1</sup> T <sup>1</sup> |
| 436G | 0                                                | -                                                            | 1.9                                                 | E <sup>2</sup>                                                                                             |
| 437A | 99.33                                            | S <sup>99</sup>                                              | 2                                                   | V <sup>2</sup>                                                                                             |
| 438E | 0                                                | -                                                            | 0                                                   | -                                                                                                          |
| 439T | 0                                                | -                                                            | 0                                                   | -                                                                                                          |
| 440F | 0                                                | -                                                            | 1.6                                                 | Y <sup>2</sup>                                                                                             |
| 441Y | 0                                                | -                                                            | 0                                                   | -                                                                                                          |
| 442V | 0                                                | -                                                            | 0                                                   | -                                                                                                          |
| 443D | 100                                              | G <sup>2</sup> H <sup>98</sup>                               | 0                                                   | -                                                                                                          |
| 444G | 0                                                | -                                                            | 0                                                   | -                                                                                                          |
| 445A | 100                                              | G <sup>84</sup> S <sup>16</sup>                              | 0                                                   | -                                                                                                          |
| 446A | 84.58                                            | G <sup>82</sup> S <sup>3</sup>                               | 5.5                                                 | S <sup>6</sup>                                                                                             |
| 447N | 69.71                                            | D <sup>70</sup>                                              | 4.7                                                 | S <sup>4</sup>                                                                                             |
| 448R | 7.59                                             | K <sup>8</sup>                                               | 0.7                                                 | K <sup>1</sup>                                                                                             |
| 449E | 92.42                                            | D <sup>92</sup>                                              | 6.2                                                 | D <sup>5</sup>                                                                                             |
| 450T | 96.07                                            | N <sup>48</sup> S <sup>48</sup>                              | 0.9                                                 | S <sup>1</sup>                                                                                             |

|      | Computational Model<br><i>Neutral parameters</i> |                                                                                | Stanford Database<br><i>Pre-inhibitor Treatment</i> |                                                                                                          |
|------|--------------------------------------------------|--------------------------------------------------------------------------------|-----------------------------------------------------|----------------------------------------------------------------------------------------------------------|
|      | % Non-Native                                     | Predicted Mutations                                                            | % Non-Native                                        | Observed Mutations                                                                                       |
| 451K | 92.42                                            | N <sup>92</sup>                                                                | 4.1                                                 | R <sup>4</sup>                                                                                           |
| 452L | 0.40                                             | -                                                                              | 14                                                  | A <sup>1</sup> I <sup>5</sup> K <sup>1</sup> M <sup>1</sup> Q <sup>1</sup> S <sup>5</sup> V <sup>1</sup> |
| 453G | 0                                                | -                                                                              | 0                                                   | -                                                                                                        |
| 454K | 34.42                                            | R <sup>5</sup> T <sup>29</sup>                                                 | 4.8                                                 | R <sup>5</sup>                                                                                           |
| 455A | 0.67                                             | T <sup>1</sup>                                                                 | 0                                                   | -                                                                                                        |
| 456G | 0                                                | -                                                                              | 0                                                   | -                                                                                                        |
| 457Y | 0.02                                             | -                                                                              | 0                                                   | -                                                                                                        |
| 458V | 0.13                                             | -                                                                              | 0.9                                                 | I <sup>1</sup>                                                                                           |
| 459T | 0                                                | -                                                                              | 0                                                   | -                                                                                                        |
| 460D | 0.01                                             | -                                                                              | 40                                                  | N <sup>38</sup> S <sup>2</sup>                                                                           |
| 461R | 0.06                                             | -                                                                              | 21.4                                                | K <sup>21</sup>                                                                                          |
| 462G | 0                                                | -                                                                              | 0                                                   | -                                                                                                        |
| 463R | 99.87                                            | I <sup>100</sup>                                                               | 3.1                                                 | K <sup>3</sup>                                                                                           |
| 464Q | 1.81                                             | R <sup>2</sup>                                                                 | 0.3                                                 | -                                                                                                        |
| 465K | 7.59                                             | R <sup>8</sup>                                                                 | 0.4                                                 | -                                                                                                        |
| 466V | 99.34                                            | D <sup>97</sup> G <sup>1</sup> I <sup>1</sup> L <sup>1</sup>                   | 6.8                                                 | A <sup>5</sup> I <sup>2</sup>                                                                            |
| 467V | 0.92                                             | D <sup>1</sup>                                                                 | 13.8                                                | I <sup>14</sup>                                                                                          |
| 468S | 76.76                                            | P <sup>23</sup> T <sup>53</sup>                                                | 32.6                                                | H <sup>1</sup> P <sup>23</sup> T <sup>9</sup>                                                            |
| 469L | 15.89                                            | F <sup>16</sup>                                                                | 7.2                                                 | I <sup>6</sup>                                                                                           |
| 470T | 0                                                | -                                                                              | 12.8                                                | A <sup>5</sup> N <sup>4</sup> P <sup>2</sup> S <sup>1</sup>                                              |
| 471D | 100                                              | G <sup>100</sup>                                                               | 6.3                                                 | E <sup>5</sup> N <sup>1</sup>                                                                            |
| 472T | 0                                                | -                                                                              | 0.3                                                 | -                                                                                                        |
| 473T | 0.01                                             | -                                                                              | 0                                                   | -                                                                                                        |
| 474N | 99.07                                            | D <sup>11</sup> I <sup>5</sup> K <sup>11</sup> S <sup>60</sup> T <sup>11</sup> | 0                                                   | -                                                                                                        |
| 475Q | 31.18                                            | E <sup>1</sup> K <sup>30</sup>                                                 | 0                                                   | -                                                                                                        |
| 476K | 8.14                                             | T <sup>8</sup>                                                                 | 2                                                   | Q <sup>2</sup>                                                                                           |
| 477T | 96.56                                            | A <sup>96</sup>                                                                | 4.6                                                 | A <sup>4</sup>                                                                                           |
| 478E | 0                                                | -                                                                              | 0                                                   | -                                                                                                        |
| 479L | 0.03                                             | -                                                                              | 0                                                   | -                                                                                                        |
| 480Q | 0.67                                             | L <sup>1</sup>                                                                 | 6                                                   | E <sup>1</sup> H <sup>5</sup>                                                                            |
| 481A | 0                                                | -                                                                              | 0                                                   | -                                                                                                        |
| 482I | 0.14                                             | -                                                                              | 1                                                   | V <sup>1</sup>                                                                                           |
| 483H | 100                                              | L <sup>70</sup> R <sup>30</sup>                                                | 36.8                                                | L <sup>3</sup> N <sup>5</sup> Q <sup>6</sup> Y <sup>23</sup>                                             |
| 484L | 3.56                                             | Q <sup>3</sup>                                                                 | 0.3                                                 | -                                                                                                        |
| 485A | 0                                                | -                                                                              | 0                                                   | -                                                                                                        |
| 486L | 0                                                | -                                                                              | 0                                                   | -                                                                                                        |
| 487Q | 0.06                                             | -                                                                              | 0.7                                                 | -                                                                                                        |
| 488D | 0                                                | -                                                                              | 0                                                   | -                                                                                                        |
| 489S | 0                                                | -                                                                              | 0                                                   | -                                                                                                        |
| 490G | 3.44                                             | S <sup>3</sup>                                                                 | 2.3                                                 | E <sup>2</sup>                                                                                           |
| 491L | 96.56                                            | S <sup>97</sup>                                                                | 30.6                                                | A <sup>2</sup> P <sup>2</sup> S <sup>22</sup> T <sup>1</sup> V <sup>4</sup>                              |
| 492E | 92.66                                            | K <sup>89</sup> Q <sup>3</sup>                                                 | 0.7                                                 | -                                                                                                        |
| 493V | 84.20                                            | A <sup>1</sup> I <sup>84</sup>                                                 | 0                                                   | -                                                                                                        |
| 494N | 0.39                                             | -                                                                              | 0                                                   | -                                                                                                        |
| 495I | 0                                                | -                                                                              | 0.7                                                 | -                                                                                                        |
| 496V | 0.01                                             | -                                                                              | 0.3                                                 | -                                                                                                        |
| 497T | 15.93                                            | I <sup>16</sup>                                                                | 0.4                                                 | -                                                                                                        |
| 498D | 0.01                                             | -                                                                              | 0                                                   | -                                                                                                        |
| 499S | 0                                                | -                                                                              | 0                                                   | -                                                                                                        |
| 500Q | 98.84                                            | L <sup>99</sup>                                                                | 0                                                   | -                                                                                                        |

|      | Computational Model<br><i>Neutral parameters</i> |                                                                | Stanford Database<br><i>Pre-inhibitor Treatment</i> |                                                             |
|------|--------------------------------------------------|----------------------------------------------------------------|-----------------------------------------------------|-------------------------------------------------------------|
|      | % Non-Native                                     | Predicted Mutations                                            | % Non-Native                                        | Observed Mutations                                          |
| 501Y | 51.04                                            | F <sup>49</sup> N <sup>2</sup>                                 | 0                                                   | -                                                           |
| 502A | 50.04                                            | V <sup>50</sup>                                                | 1.7                                                 | V <sup>1</sup>                                              |
| 503L | 0.39                                             | -                                                              | 2.5                                                 | I <sup>2</sup>                                              |
| 504G | 100                                              | W <sup>100</sup>                                               | 0                                                   | -                                                           |
| 505I | 15.99                                            | L <sup>16</sup>                                                | 0                                                   | -                                                           |
| 506I | 84.13                                            | L <sup>84</sup>                                                | 0.9                                                 | L <sup>1</sup>                                              |
| 507Q | 50.60                                            | L <sup>49</sup> R <sup>1</sup>                                 | 1.9                                                 | H <sup>2</sup>                                              |
| 508A | 100                                              | D <sup>100</sup>                                               | 0.3                                                 | -                                                           |
| 509Q | 0.29                                             | -                                                              | 2.7                                                 | H <sup>1</sup> K <sup>1</sup>                               |
| 510P | 0                                                | -                                                              | 0                                                   | -                                                           |
| 511D | 0.07                                             | -                                                              | 0                                                   | -                                                           |
| 512K | 100                                              | E <sup>16</sup> T <sup>84</sup>                                | 12.4                                                | I <sup>1</sup> Q <sup>4</sup> R <sup>6</sup> T <sup>1</sup> |
| 513S | 0                                                | -                                                              | 0                                                   | -                                                           |
| 514E | 3.06                                             | K <sup>2</sup> Q <sup>2</sup>                                  | 0.8                                                 | D <sup>1</sup>                                              |
| 515S | 70.04                                            | L <sup>1</sup> T <sup>69</sup>                                 | 0                                                   | -                                                           |
| 516E | 31.07                                            | D <sup>30</sup> Q <sup>1</sup>                                 | 1.9                                                 | D <sup>1</sup>                                              |
| 517L | 0.67                                             | I <sup>1</sup>                                                 | 17                                                  | I <sup>12</sup> V <sup>5</sup>                              |
| 518V | 98.26                                            | E <sup>49</sup> L <sup>49</sup>                                | 0                                                   | -                                                           |
| 519S | 100                                              | N <sup>100</sup>                                               | 36                                                  | N <sup>36</sup>                                             |
| 520Q | 34.74                                            | E <sup>1</sup> K <sup>28</sup> R <sup>5</sup>                  | 2.7                                                 | K <sup>2</sup> L <sup>1</sup>                               |
| 521I | 0                                                | -                                                              | 0                                                   | -                                                           |
| 522I | 0.13                                             | -                                                              | 0                                                   | -                                                           |
| 523E | 1.82                                             | Q <sup>2</sup>                                                 | 0.3                                                 | -                                                           |
| 524Q | 96.81                                            | E <sup>7</sup> L <sup>89</sup>                                 | 12.9                                                | E <sup>12</sup>                                             |
| 525L | 0                                                | -                                                              | 0                                                   | -                                                           |
| 526I | 0.01                                             | -                                                              | 1.1                                                 | V <sup>1</sup>                                              |
| 527K | 0.69                                             | -                                                              | 13.9                                                | N <sup>10</sup> Q <sup>2</sup> R <sup>2</sup>               |
| 528K | 7.59                                             | T <sup>8</sup>                                                 | 0                                                   | -                                                           |
| 529E | 14.21                                            | K <sup>7</sup> Q <sup>7</sup>                                  | 1.6                                                 | D <sup>2</sup>                                              |
| 530K | 7.59                                             | R <sup>8</sup>                                                 | 4.3                                                 | R <sup>4</sup>                                              |
| 531V | 0.02                                             | -                                                              | 8                                                   | I <sup>8</sup>                                              |
| 532Y | 0                                                | -                                                              | 0                                                   | -                                                           |
| 533L | 96.56                                            | F <sup>97</sup>                                                | 0.4                                                 | -                                                           |
| 534A | 100                                              | S <sup>100</sup>                                               | 10.8                                                | S <sup>7</sup> T <sup>3</sup>                               |
| 535W | 0                                                | -                                                              | 0                                                   | -                                                           |
| 536V | 99.96                                            | F <sup>100</sup>                                               | 0                                                   | -                                                           |
| 537P | 0                                                | -                                                              | 0                                                   | -                                                           |
| 538A | 100                                              | P <sup>100</sup>                                               | 0                                                   | -                                                           |
| 539H | 99.97                                            | N <sup>100</sup>                                               | 0                                                   | -                                                           |
| 540K | 100                                              | N <sup>1</sup> Q <sup>3</sup> R <sup>3</sup> T <sup>92</sup>   | 0                                                   | -                                                           |
| 541G | 1.17                                             | D <sup>1</sup>                                                 | 0                                                   | -                                                           |
| 542I | 25.11                                            | F <sup>25</sup>                                                | 0                                                   | -                                                           |
| 543G | 0                                                | -                                                              | 0                                                   | -                                                           |
| 544G | 0                                                | -                                                              | 0                                                   | -                                                           |
| 545N | 99.96                                            | D <sup>1</sup> H <sup>14</sup> S <sup>43</sup> T <sup>43</sup> | 0                                                   | -                                                           |
| 546E | 0                                                | -                                                              | 0.3                                                 | -                                                           |
| 547Q | 2.64                                             | E <sup>3</sup>                                                 | 2                                                   | K <sup>2</sup>                                              |
| 548V | 99.61                                            | A <sup>100</sup>                                               | 4                                                   | I <sup>4</sup>                                              |
| 549D | 69.71                                            | E <sup>70</sup>                                                | 0                                                   | -                                                           |
| 550K | 98.38                                            | N <sup>2</sup> Q <sup>2</sup> R <sup>34</sup> T <sup>60</sup>  | 0                                                   | -                                                           |

|      | Computational Model<br><i>Neutral parameters</i> |                                                                                                          | Stanford Database<br><i>Pre-inhibitor Treatment</i> |                                                               |
|------|--------------------------------------------------|----------------------------------------------------------------------------------------------------------|-----------------------------------------------------|---------------------------------------------------------------|
|      | % Non-Native                                     | Predicted Mutations                                                                                      | % Non-Native                                        | Observed Mutations                                            |
| 551L | 0.01                                             | -                                                                                                        | 0                                                   | -                                                             |
| 552V | 6.66                                             | D <sup>3</sup> I <sup>3</sup>                                                                            | 0                                                   | -                                                             |
| 553S | 70.03                                            | G <sup>1</sup> N <sup>69</sup>                                                                           | 0                                                   | -                                                             |
| 554A | 100                                              | D <sup>100</sup>                                                                                         | 46.7                                                | K <sup>1</sup> N <sup>8</sup> S <sup>18</sup> T <sup>19</sup> |
| 555G | 0.05                                             | -                                                                                                        | 0                                                   | -                                                             |
| 556I | 100                                              | N <sup>49</sup> T <sup>49</sup> V <sup>2</sup>                                                           | 2.7                                                 | V <sup>3</sup>                                                |
| 557R | 0.15                                             | -                                                                                                        | 0                                                   | -                                                             |
| 558K | 99.79                                            | E <sup>14</sup> N <sup>14</sup> T <sup>72</sup>                                                          | 13.3                                                | R <sup>13</sup>                                               |
| 559V | 7.04                                             | E <sup>1</sup> N <sup>1</sup> Q <sup>1</sup> R <sup>1</sup> T <sup>1</sup>                               | 8.3                                                 | I <sup>8</sup>                                                |
| 560L | 30.05                                            | A <sup>4</sup> D <sup>4</sup> E <sup>4</sup> F <sup>4</sup> G <sup>4</sup> I <sup>4</sup> M <sup>4</sup> | 0                                                   | -                                                             |
