# Supplementary material for: Prediction of Mutational Tolerance in HIV-1 Protease and Reverse Transcriptase Using Flexible Backbone Protein Design
Source: PubMed Central journal article supplement (PMC3426558; doi:10.1371/journal.pcbi.1002639), 2012-08-23
Supplement: pcbi.1002639.s005.pdf [file pcbi.1002639.s005.pdf]

**Figure S5:** Predicted and observed HIV-1 reverse transcriptase amino acid substitutions for the selective model

|     | Computational Model<br><i>Selective parameters</i> |                                                                               | Stanford Database<br><i>Post-inhibitor Treatment</i> |                                                                             |
|-----|----------------------------------------------------|-------------------------------------------------------------------------------|------------------------------------------------------|-----------------------------------------------------------------------------|
|     | % Non-Native                                       | Predicted Mutations                                                           | % Non-Native                                         | Observed Mutations                                                          |
| 1P  | 90.53                                              | L <sup>16</sup> Q <sup>50</sup> R <sup>2</sup> S <sup>16</sup> T <sup>5</sup> | 0.1                                                  | -                                                                           |
| 2I  | 2.09                                               | V <sup>2</sup>                                                                | 0.1                                                  | -                                                                           |
| 3S  | 0.22                                               | -                                                                             | 0                                                    | -                                                                           |
| 4P  | 0                                                  | -                                                                             | 2.6                                                  | S <sup>2</sup> T <sup>1</sup>                                               |
| 5I  | 15.91                                              | V <sup>16</sup>                                                               | 0                                                    | -                                                                           |
| 6E  | 84.49                                              | D <sup>82</sup> K <sup>1</sup> Q <sup>2</sup>                                 | 5.7                                                  | D <sup>4</sup> K <sup>2</sup>                                               |
| 7T  | 13.41                                              | P <sup>12</sup> S <sup>1</sup>                                                | 0.6                                                  | -                                                                           |
| 8V  | 0.34                                               | -                                                                             | 0.3                                                  | -                                                                           |
| 9P  | 1.86                                               | Q <sup>2</sup>                                                                | 0                                                    | -                                                                           |
| 10V | 0                                                  | -                                                                             | 0                                                    | -                                                                           |
| 11K | 99.95                                              | T <sup>100</sup>                                                              | 1.6                                                  | R <sup>2</sup>                                                              |
| 12L | 0                                                  | -                                                                             | 0                                                    | -                                                                           |
| 13K | 0.04                                               | -                                                                             | 0.1                                                  | -                                                                           |
| 14P | 0.06                                               | -                                                                             | 0                                                    | -                                                                           |
| 15G | 0                                                  | -                                                                             | 0                                                    | -                                                                           |
| 16M | 99.14                                              | K <sup>1</sup> L <sup>24</sup> T <sup>73</sup>                                | 0.5                                                  | V <sup>1</sup>                                                              |
| 17D | 0.01                                               | -                                                                             | 0                                                    | -                                                                           |
| 18G | 0                                                  | -                                                                             | 0                                                    | -                                                                           |
| 19P | 0                                                  | -                                                                             | 0                                                    | -                                                                           |
| 20K | 82.34                                              | M <sup>1</sup> N <sup>54</sup> Q <sup>1</sup> R <sup>23</sup> T <sup>3</sup>  | 19.8                                                 | R <sup>20</sup>                                                             |
| 21V | 0.43                                               | -                                                                             | 1.4                                                  | I <sup>1</sup>                                                              |
| 22K | 13.72                                              | E <sup>3</sup> N <sup>2</sup> Q <sup>4</sup> R <sup>1</sup> T <sup>5</sup>    | 0.6                                                  | R <sup>1</sup>                                                              |
| 23Q | 0.01                                               | -                                                                             | 0                                                    | -                                                                           |
| 24W | 99.95                                              | L <sup>85</sup> R <sup>9</sup> S <sup>5</sup>                                 | 0                                                    | -                                                                           |
| 25P | 0                                                  | -                                                                             | 0                                                    | -                                                                           |
| 26L | 0                                                  | -                                                                             | 0                                                    | -                                                                           |
| 27T | 3.37                                               | P <sup>3</sup>                                                                | 1.2                                                  | S <sup>1</sup>                                                              |
| 28E | 0.08                                               | -                                                                             | 2.3                                                  | A <sup>1</sup> K <sup>2</sup>                                               |
| 29E | 1.1                                                | Q <sup>1</sup>                                                                | 0                                                    | -                                                                           |
| 30K | 16.81                                              | E <sup>1</sup> Q <sup>16</sup>                                                | 0                                                    | -                                                                           |
| 31I | 0.13                                               | -                                                                             | 0.8                                                  | L <sup>1</sup>                                                              |
| 32K | 22.01                                              | E <sup>2</sup> N <sup>1</sup> Q <sup>3</sup> R <sup>17</sup>                  | 2.1                                                  | E <sup>1</sup>                                                              |
| 33A | 0                                                  | -                                                                             | 0.1                                                  | -                                                                           |
| 34L | 0                                                  | -                                                                             | 0.2                                                  | -                                                                           |
| 35V | 95.22                                              | E <sup>4</sup> I <sup>15</sup> L <sup>77</sup>                                | 30.1                                                 | I <sup>12</sup> L <sup>4</sup> M <sup>7</sup> R <sup>1</sup> T <sup>7</sup> |
| 36E | 4.6                                                | D <sup>1</sup> K <sup>2</sup> Q <sup>2</sup>                                  | 0.6                                                  | -                                                                           |
| 37I | 0.69                                               | L <sup>1</sup>                                                                | 0.2                                                  | -                                                                           |
| 38C | NA                                                 | NA                                                                            | NA                                                   | NA                                                                          |
| 39T | 60.2                                               | A <sup>1</sup> K <sup>23</sup> N <sup>26</sup> R <sup>10</sup>                | 19.7                                                 | A <sup>16</sup> E <sup>2</sup> K <sup>1</sup> S <sup>1</sup>                |
| 40E | 7.83                                               | K <sup>6</sup> Q <sup>2</sup>                                                 | 2.5                                                  | D <sup>1</sup> F <sup>2</sup>                                               |
| 41M | 15.89                                              | L <sup>16</sup>                                                               | 54.4                                                 | L <sup>54</sup>                                                             |
| 42E | 0.02                                               | -                                                                             | 0.1                                                  | -                                                                           |
| 43K | 34.89                                              | E <sup>7</sup> N <sup>21</sup> Q <sup>2</sup> R <sup>4</sup>                  | 21.5                                                 | E <sup>12</sup> N <sup>3</sup> Q <sup>6</sup>                               |
| 44E | 45.87                                              | D <sup>18</sup> K <sup>10</sup> Q <sup>18</sup>                               | 19.3                                                 | A <sup>3</sup> D <sup>16</sup>                                              |
| 45G | 0                                                  | -                                                                             | 0                                                    | -                                                                           |
| 46K | 15.9                                               | R <sup>16</sup>                                                               | 0.2                                                  | -                                                                           |
| 47I | 0.68                                               | V <sup>1</sup>                                                                | 0                                                    | -                                                                           |
| 48S | 1.16                                               | T <sup>1</sup>                                                                | 2.2                                                  | T <sup>2</sup>                                                              |
| 49K | 8.82                                               | Q <sup>1</sup> R <sup>2</sup> T <sup>6</sup>                                  | 4.9                                                  | R <sup>5</sup>                                                              |
| 50I | 6.85                                               | T <sup>3</sup> V <sup>3</sup>                                                 | 0.7                                                  | V <sup>1</sup>                                                              |

|      | Computational Model<br><i>Selective parameters</i> |                                                              | Stanford Database<br><i>Post-inhibitor Treatment</i> |                                                                            |
|------|----------------------------------------------------|--------------------------------------------------------------|------------------------------------------------------|----------------------------------------------------------------------------|
|      | % Non-Native                                       | Predicted Mutations                                          | % Non-Native                                         | Observed Mutations                                                         |
| 51G  | 0                                                  | -                                                            | 0                                                    | -                                                                          |
| 52P  | 0.6                                                | T <sup>1</sup>                                               | 0                                                    | -                                                                          |
| 53E  | 99.87                                              | D <sup>100</sup>                                             | 0.9                                                  | D <sup>1</sup>                                                             |
| 54N  | 99.93                                              | D <sup>97</sup> I <sup>3</sup>                               | 0.2                                                  | -                                                                          |
| 55P  | 0.13                                               | -                                                            | 0                                                    | -                                                                          |
| 56Y  | 0.05                                               | -                                                            | 0                                                    | -                                                                          |
| 57N  | 66.7                                               | S <sup>67</sup>                                              | 0                                                    | -                                                                          |
| 58T  | 1.6                                                | I <sup>2</sup>                                               | 0.3                                                  | -                                                                          |
| 59P  | 0                                                  | -                                                            | 0                                                    | -                                                                          |
| 60V  | 1.17                                               | I <sup>1</sup>                                               | 15.4                                                 | I <sup>15</sup>                                                            |
| 61F  | 5.86                                               | Y <sup>6</sup>                                               | 0                                                    | -                                                                          |
| 62A  | 58.25                                              | S <sup>14</sup> T <sup>3</sup> V <sup>42</sup>               | 4.5                                                  | V <sup>6</sup>                                                             |
| 63I  | 0.74                                               | V <sup>1</sup>                                               | 0                                                    | -                                                                          |
| 64K  | 11.66                                              | N <sup>10</sup> R <sup>1</sup> T <sup>1</sup>                | 3.4                                                  | H <sup>1</sup> R <sup>2</sup>                                              |
| 65K  | 16.33                                              | E <sup>9</sup> N <sup>3</sup> Q <sup>3</sup> R <sup>1</sup>  | 2.6                                                  | R <sup>3</sup>                                                             |
| 66K  | 100                                                | N <sup>100</sup>                                             | 0                                                    | -                                                                          |
| 67D  | 94.19                                              | G <sup>41</sup> N <sup>54</sup>                              | 50                                                   | E <sup>1</sup> G <sup>3</sup> N <sup>45</sup>                              |
| 68S  | 77.8                                               | G <sup>51</sup> N <sup>22</sup> T <sup>4</sup>               | 7.7                                                  | G <sup>7</sup>                                                             |
| 69T  | 99.33                                              | N <sup>99</sup>                                              | 21.8                                                 | D <sup>13</sup> N <sup>7</sup> S <sup>1</sup>                              |
| 70K  | 98.17                                              | E <sup>17</sup> Q <sup>51</sup> T <sup>29</sup>              | 23.7                                                 | G <sup>1</sup> R <sup>22</sup>                                             |
| 71W  | 0                                                  | -                                                            | 0                                                    | -                                                                          |
| 72R  | 0.02                                               | -                                                            | 0                                                    | -                                                                          |
| 73K  | 99.99                                              | E <sup>6</sup> N <sup>91</sup> Q <sup>2</sup> T <sup>2</sup> | 0.1                                                  | -                                                                          |
| 74L  | 5.91                                               | V <sup>6</sup>                                               | 23.6                                                 | I <sup>8</sup> V <sup>16</sup>                                             |
| 75V  | 0                                                  | -                                                            | 12.7                                                 | A <sup>1</sup> I <sup>3</sup> L <sup>1</sup> M <sup>6</sup> T <sup>3</sup> |
| 76D  | 0                                                  | -                                                            | 0                                                    | -                                                                          |
| 77F  | 0                                                  | -                                                            | 2.6                                                  | L <sup>3</sup>                                                             |
| 78R  | 0.01                                               | -                                                            | 0                                                    | -                                                                          |
| 79E  | 0                                                  | -                                                            | 0.2                                                  | -                                                                          |
| 80L  | 0                                                  | -                                                            | 0                                                    | -                                                                          |
| 81N  | 3.54                                               | D <sup>3</sup>                                               | 0                                                    | -                                                                          |
| 82K  | 5.39                                               | N <sup>3</sup> R <sup>2</sup>                                | 0.5                                                  | R <sup>1</sup>                                                             |
| 83R  | 0                                                  | -                                                            | 9.4                                                  | K <sup>9</sup>                                                             |
| 84T  | 0                                                  | -                                                            | 0                                                    | -                                                                          |
| 85Q  | 0.03                                               | -                                                            | 0                                                    | -                                                                          |
| 86D  | 0.59                                               | -                                                            | 0.3                                                  | -                                                                          |
| 87F  | 0                                                  | -                                                            | 0                                                    | -                                                                          |
| 88W  | 91.42                                              | S <sup>91</sup>                                              | 0.1                                                  | -                                                                          |
| 89E  | 49.41                                              | D <sup>4</sup> K <sup>7</sup> Q <sup>38</sup>                | 0                                                    | -                                                                          |
| 90V  | 71.63                                              | G <sup>65</sup> I <sup>6</sup>                               | 3.7                                                  | I <sup>4</sup>                                                             |
| 91Q  | 1.76                                               | L <sup>1</sup>                                               | 0                                                    | -                                                                          |
| 92L  | 0.02                                               | -                                                            | 0                                                    | -                                                                          |
| 93G  | 0.03                                               | -                                                            | 0                                                    | -                                                                          |
| 94I  | 95.99                                              | L <sup>21</sup> T <sup>74</sup>                              | 0.6                                                  | L <sup>1</sup>                                                             |
| 95P  | 0                                                  | -                                                            | 0                                                    | -                                                                          |
| 96H  | 0                                                  | -                                                            | 0                                                    | -                                                                          |
| 97P  | 0                                                  | -                                                            | 0                                                    | -                                                                          |
| 98A  | 99.89                                              | S <sup>100</sup>                                             | 15.2                                                 | G <sup>7</sup> S <sup>6</sup>                                              |
| 99G  | 0                                                  | -                                                            | 0                                                    | -                                                                          |
| 100L | 0                                                  | -                                                            | 5.8                                                  | I <sup>6</sup>                                                             |

|      | Computational Model<br><i>Selective parameters</i> |                                                                                              | Stanford Database<br><i>Post-inhibitor Treatment</i> |                                                                                            |
|------|----------------------------------------------------|----------------------------------------------------------------------------------------------|------------------------------------------------------|--------------------------------------------------------------------------------------------|
|      | % Non-Native                                       | Predicted Mutations                                                                          | % Non-Native                                         | Observed Mutations                                                                         |
| 101K | 2.98                                               | E <sup>1</sup> T <sup>1</sup>                                                                | 15.5                                                 | E <sup>6</sup> H <sup>2</sup> P <sup>2</sup> Q <sup>5</sup> R <sup>1</sup>                 |
| 102K | 32.26                                              | E <sup>2</sup> N <sup>22</sup> Q <sup>7</sup>                                                | 6.1                                                  | Q <sup>3</sup> R <sup>2</sup>                                                              |
| 103K | 11.82                                              | Q <sup>3</sup> R <sup>1</sup> T <sup>8</sup>                                                 | 43                                                   | N <sup>40</sup> R <sup>2</sup> S <sup>2</sup>                                              |
| 104K | 6.07                                               | N <sup>3</sup> T <sup>2</sup>                                                                | 1.4                                                  | N <sup>1</sup> R <sup>1</sup>                                                              |
| 105S | 54.41                                              | F <sup>35</sup> Y <sup>20</sup>                                                              | 0.1                                                  | -                                                                                          |
| 106V | 0.01                                               | -                                                                                            | 5.2                                                  | A <sup>2</sup> I <sup>3</sup>                                                              |
| 107T | 0                                                  | -                                                                                            | 0.2                                                  | -                                                                                          |
| 108V | 0                                                  | -                                                                                            | 8.1                                                  | I <sup>8</sup>                                                                             |
| 109L | 0                                                  | -                                                                                            | 0.8                                                  | I <sup>1</sup>                                                                             |
| 110D | NA                                                 | NA                                                                                           | NA                                                   | NA                                                                                         |
| 111V | 84.14                                              | I <sup>54</sup>                                                                              | 1.6                                                  | I <sup>2</sup>                                                                             |
| 112G | 26.94                                              | A <sup>3</sup> S <sup>24</sup>                                                               | 0                                                    | -                                                                                          |
| 113D | 50.17                                              | N <sup>50</sup>                                                                              | 0.1                                                  | -                                                                                          |
| 114A | 0.01                                               | -                                                                                            | 0                                                    | -                                                                                          |
| 115Y | 0.23                                               | -                                                                                            | 2.3                                                  | F <sup>2</sup>                                                                             |
| 116F | 98.85                                              | L <sup>98</sup> S <sup>1</sup>                                                               | 3.1                                                  | Y <sup>3</sup>                                                                             |
| 117S | 8.22                                               | L <sup>1</sup> T <sup>6</sup>                                                                | 0.1                                                  | -                                                                                          |
| 118V | 0                                                  | -                                                                                            | 32                                                   | I <sup>32</sup>                                                                            |
| 119P | 0                                                  | -                                                                                            | 0                                                    | -                                                                                          |
| 120L | 0                                                  | -                                                                                            | 0                                                    | -                                                                                          |
| 121D | 0.3                                                | -                                                                                            | 4.1                                                  | H <sup>2</sup> Y <sup>2</sup>                                                              |
| 122K | 35.57                                              | E <sup>21</sup> Q <sup>7</sup> R <sup>7</sup>                                                | 55.9                                                 | E <sup>53</sup> P <sup>3</sup>                                                             |
| 123D | 6.66                                               | E <sup>3</sup> N <sup>3</sup>                                                                | 28.3                                                 | E <sup>23</sup> N <sup>4</sup> S <sup>1</sup>                                              |
| 124F | 36.46                                              | Y <sup>36</sup>                                                                              | 0                                                    | -                                                                                          |
| 125R | 0                                                  | -                                                                                            | 0                                                    | -                                                                                          |
| 126K | 1.92                                               | E <sup>1</sup>                                                                               | 0                                                    | -                                                                                          |
| 127Y | 15.9                                               | F <sup>16</sup>                                                                              | 0                                                    | -                                                                                          |
| 128T | 0                                                  | -                                                                                            | 0                                                    | -                                                                                          |
| 129A | 0.02                                               | -                                                                                            | 0                                                    | -                                                                                          |
| 130F | 0                                                  | -                                                                                            | 0                                                    | -                                                                                          |
| 131T | 0                                                  | -                                                                                            | 0                                                    | -                                                                                          |
| 132I | 0.13                                               | -                                                                                            | 0.1                                                  | -                                                                                          |
| 133P | 0                                                  | -                                                                                            | 0                                                    | -                                                                                          |
| 134S | 0.07                                               | -                                                                                            | 0                                                    | -                                                                                          |
| 135I | 68.88                                              | K <sup>3</sup> L <sup>21</sup> R <sup>1</sup> S <sup>12</sup> T <sup>9</sup> V <sup>24</sup> | 45                                                   | K <sup>1</sup> L <sup>4</sup> M <sup>2</sup> R <sup>1</sup> T <sup>30</sup> V <sup>8</sup> |
| 136N | 0.04                                               | -                                                                                            | 0                                                    | -                                                                                          |
| 137N | 0.71                                               | H <sup>1</sup>                                                                               | 0.1                                                  | -                                                                                          |
| 138E | 51.15                                              | D <sup>49</sup> Q <sup>2</sup>                                                               | 2.4                                                  | A <sup>2</sup> Q <sup>1</sup>                                                              |
| 139T | 0.14                                               | -                                                                                            | 1.7                                                  | K <sup>1</sup>                                                                             |
| 140P | 1.71                                               | T <sup>1</sup>                                                                               | 0                                                    | -                                                                                          |
| 141G | 0                                                  | -                                                                                            | 0                                                    | -                                                                                          |
| 142I | 8.33                                               | K <sup>2</sup> L <sup>2</sup> N <sup>1</sup> T <sup>1</sup> V <sup>3</sup>                   | 12.2                                                 | T <sup>2</sup> V <sup>10</sup>                                                             |
| 143R | 4.67                                               | I <sup>3</sup> M <sup>2</sup>                                                                | 0                                                    | -                                                                                          |
| 144Y | 0                                                  | -                                                                                            | 0                                                    | -                                                                                          |
| 145Q | 75.31                                              | R <sup>75</sup>                                                                              | 0                                                    | -                                                                                          |
| 146Y | 1.16                                               | F <sup>1</sup>                                                                               | 0                                                    | -                                                                                          |
| 147N | 2.05                                               | D <sup>2</sup>                                                                               | 0                                                    | -                                                                                          |
| 148V | 0                                                  | -                                                                                            | 0                                                    | -                                                                                          |
| 149L | 0                                                  | -                                                                                            | 0                                                    | -                                                                                          |
| 150P | 0                                                  | -                                                                                            | 0                                                    | -                                                                                          |

|      | Computational Model<br><i>Selective parameters</i> |                                                                                              | Stanford Database<br><i>Post-inhibitor Treatment</i> |                                                                            |
|------|----------------------------------------------------|----------------------------------------------------------------------------------------------|------------------------------------------------------|----------------------------------------------------------------------------|
|      | % Non-Native                                       | Predicted Mutations                                                                          | % Non-Native                                         | Observed Mutations                                                         |
| 151Q | 95.51                                              | P <sup>95</sup>                                                                              | 3.9                                                  | M <sup>4</sup>                                                             |
| 152G | 0                                                  | -                                                                                            | 0                                                    | -                                                                          |
| 153W | 0                                                  | -                                                                                            | 0                                                    | -                                                                          |
| 154K | 0                                                  | -                                                                                            | 0                                                    | -                                                                          |
| 155G | 0                                                  | -                                                                                            | 0                                                    | -                                                                          |
| 156S | 95.5                                               | A <sup>96</sup>                                                                              | 0                                                    | -                                                                          |
| 157P | 4.97                                               | A <sup>3</sup> L <sup>1</sup> T <sup>1</sup>                                                 | 0                                                    | -                                                                          |
| 158A | 0.1                                                | -                                                                                            | 2.3                                                  | S <sup>2</sup>                                                             |
| 159I | 0.01                                               | -                                                                                            | 0.1                                                  | -                                                                          |
| 160F | 0.01                                               | -                                                                                            | 0                                                    | -                                                                          |
| 161Q | 8.90                                               | E <sup>6</sup> L <sup>2</sup> R <sup>1</sup>                                                 | 0                                                    | -                                                                          |
| 162S | 30.40                                              | N <sup>2</sup> R <sup>5</sup> T <sup>23</sup>                                                | 12                                                   | A <sup>4</sup> D <sup>3</sup> N <sup>1</sup> Y <sup>4</sup>                |
| 163S | 18.93                                              | I <sup>1</sup> N <sup>3</sup> T <sup>15</sup>                                                | 0.3                                                  | -                                                                          |
| 164M | 99.78                                              | L <sup>100</sup>                                                                             | 0.1                                                  | -                                                                          |
| 165T | 7.84                                               | K <sup>4</sup> N <sup>1</sup> R <sup>2</sup> S <sup>1</sup>                                  | 2                                                    | I <sup>2</sup>                                                             |
| 166K | 2.45                                               | Q <sup>1</sup> R <sup>1</sup> T <sup>1</sup>                                                 | 7                                                    | R <sup>6</sup>                                                             |
| 167I | 0.22                                               | -                                                                                            | 0.6                                                  | V <sup>1</sup>                                                             |
| 168L | 0                                                  | -                                                                                            | 0                                                    | -                                                                          |
| 169E | 0.06                                               | -                                                                                            | 5.1                                                  | D <sup>5</sup>                                                             |
| 170P | 91.53                                              | A <sup>1</sup> L <sup>3</sup> Q <sup>78</sup> R <sup>8</sup> T <sup>2</sup>                  | 0                                                    | -                                                                          |
| 171F | 0                                                  | -                                                                                            | 0.4                                                  | -                                                                          |
| 172R | 7.76                                               | I <sup>6</sup> K <sup>2</sup>                                                                | 1.6                                                  | K <sup>2</sup>                                                             |
| 173K | 6.03                                               | N <sup>2</sup> Q <sup>3</sup>                                                                | 4.6                                                  | E <sup>1</sup> N <sup>1</sup> Q <sup>1</sup> R <sup>1</sup> T <sup>1</sup> |
| 174Q | 5.01                                               | E <sup>2</sup> K <sup>2</sup> R <sup>1</sup>                                                 | 6.9                                                  | E <sup>1</sup> H <sup>1</sup> K <sup>3</sup> R <sup>2</sup>                |
| 175N | 16.02                                              | H <sup>16</sup>                                                                              | 1                                                    | Y <sup>1</sup>                                                             |
| 176P | 0.92                                               | -                                                                                            | 0.1                                                  | -                                                                          |
| 177D | 0.41                                               | -                                                                                            | 22.5                                                 | E <sup>20</sup> G <sup>1</sup> N <sup>1</sup>                              |
| 178I | 15.98                                              | V <sup>16</sup>                                                                              | 14.4                                                 | L <sup>7</sup> M <sup>7</sup>                                              |
| 179V | 0.52                                               | -                                                                                            | 12.6                                                 | D <sup>2</sup> E <sup>1</sup> I <sup>10</sup>                              |
| 180I | 1.75                                               | V <sup>2</sup>                                                                               | 0.3                                                  | -                                                                          |
| 181Y | 2.3                                                | F <sup>2</sup>                                                                               | 1.4                                                  | I <sup>1</sup>                                                             |
| 182Q | 50.27                                              | L <sup>50</sup>                                                                              | 0                                                    | -                                                                          |
| 183Y | 36.55                                              | F <sup>36</sup>                                                                              | 0                                                    | -                                                                          |
| 184M | 0.89                                               | R <sup>1</sup>                                                                               | 53                                                   | I <sup>2</sup> V <sup>51</sup>                                             |
| 185D | NA                                                 | NA                                                                                           | NA                                                   | -                                                                          |
| 186D | NA                                                 | NA                                                                                           | NA                                                   | -                                                                          |
| 187L | 0.02                                               | -                                                                                            | 0                                                    | -                                                                          |
| 188Y | 50.00                                              | F <sup>50</sup>                                                                              | 6                                                    | L <sup>5</sup>                                                             |
| 189V | 0                                                  | -                                                                                            | 2.1                                                  | I <sup>2</sup>                                                             |
| 190G | 1.28                                               | A <sup>1</sup>                                                                               | 19.5                                                 | A <sup>16</sup> S <sup>3</sup>                                             |
| 191S | 0                                                  | -                                                                                            | 0                                                    | -                                                                          |
| 192D | 1.28                                               | N <sup>1</sup>                                                                               | 0.3                                                  | -                                                                          |
| 193L | 9.78                                               | S <sup>10</sup>                                                                              | 0                                                    | -                                                                          |
| 194E | 86.52                                              | D <sup>41</sup> K <sup>4</sup> Q <sup>41</sup>                                               | 0.4                                                  | -                                                                          |
| 195I | 99.98                                              | K <sup>27</sup> L <sup>5</sup> N <sup>5</sup> R <sup>27</sup> S <sup>9</sup> T <sup>27</sup> | 1.2                                                  | L <sup>1</sup>                                                             |
| 196G | 99.89                                              | A <sup>1</sup> D <sup>6</sup> E <sup>90</sup> R <sup>2</sup> V <sup>1</sup>                  | 21.2                                                 | E <sup>20</sup> K <sup>1</sup>                                             |
| 197Q | 28.83                                              | E <sup>1</sup> K <sup>13</sup> L <sup>1</sup> R <sup>13</sup>                                | 4.3                                                  | E <sup>2</sup> K <sup>2</sup>                                              |
| 198H | 0                                                  | -                                                                                            | 0                                                    | -                                                                          |
| 199R | 0.05                                               | -                                                                                            | 0                                                    | -                                                                          |
| 200T | 77.52                                              | K <sup>68</sup> N <sup>4</sup> R <sup>4</sup>                                                | 32                                                   | A <sup>24</sup> E <sup>2</sup> I <sup>4</sup> K <sup>1</sup>               |

|      | Computational Model<br><i>Selective parameters</i> |                                                                             | Stanford Database<br><i>Post-inhibitor Treatment</i> |                                                                                                                          |
|------|----------------------------------------------------|-----------------------------------------------------------------------------|------------------------------------------------------|--------------------------------------------------------------------------------------------------------------------------|
|      | % Non-Native                                       | Predicted Mutations                                                         | % Non-Native                                         | Observed Mutations                                                                                                       |
| 201K | 8.54                                               | N <sup>6</sup> Q <sup>2</sup> T <sup>1</sup>                                | 0.1                                                  | -                                                                                                                        |
| 202I | 99.78                                              | N <sup>1</sup> T <sup>1</sup> V <sup>98</sup>                               | 9.3                                                  | V <sup>9</sup>                                                                                                           |
| 203E | 3.19                                               | D <sup>2</sup> Q <sup>1</sup>                                               | 16.4                                                 | D <sup>6</sup> K <sup>9</sup> V <sup>1</sup>                                                                             |
| 204E | 0.15                                               | -                                                                           | 1.7                                                  | D <sup>1</sup> Q <sup>1</sup>                                                                                            |
| 205L | 0                                                  | -                                                                           | 0.1                                                  | -                                                                                                                        |
| 206R | 0.06                                               | -                                                                           | 0                                                    | -                                                                                                                        |
| 207Q | 10.89                                              | E <sup>10</sup> K <sup>1</sup> R <sup>1</sup>                               | 27.9                                                 | A <sup>2</sup> D <sup>2</sup> E <sup>21</sup> H <sup>1</sup> K <sup>2</sup> N <sup>1</sup>                               |
| 208H | 25.7                                               | D <sup>24</sup> Q <sup>1</sup>                                              | 16.5                                                 | F <sup>1</sup> Y <sup>16</sup>                                                                                           |
| 209L | 0                                                  | -                                                                           | 0                                                    | -                                                                                                                        |
| 210L | 1.77                                               | I <sup>1</sup>                                                              | 40.9                                                 | F <sup>1</sup> S <sup>1</sup> W <sup>40</sup>                                                                            |
| 211R | 2.01                                               | K <sup>2</sup>                                                              | 59.8                                                 | A <sup>1</sup> D <sup>1</sup> E <sup>1</sup> G <sup>1</sup> K <sup>53</sup> Q <sup>1</sup> S <sup>1</sup> T <sup>1</sup> |
| 212W | 99.36                                              | G <sup>1</sup> R <sup>95</sup> S <sup>3</sup>                               | 0.3                                                  | -                                                                                                                        |
| 213G | 0                                                  | -                                                                           | 0                                                    | -                                                                                                                        |
| 214F | 54.75                                              | I <sup>26</sup> L <sup>26</sup> V <sup>3</sup>                              | 11.9                                                 | L <sup>12</sup>                                                                                                          |
| 215T | 5.39                                               | I <sup>1</sup> K <sup>1</sup> R <sup>3</sup>                                | 66.4                                                 | D <sup>1</sup> F <sup>14</sup> I <sup>1</sup> V <sup>1</sup> Y <sup>50</sup>                                             |
| 216T | 0.29                                               | -                                                                           | 0                                                    | -                                                                                                                        |
| 217P | 0                                                  | -                                                                           | 0                                                    | -                                                                                                                        |
| 218D | 0.05                                               | -                                                                           | 10.9                                                 | E <sup>11</sup>                                                                                                          |
| 219K | 10                                                 | E <sup>10</sup>                                                             | 38.2                                                 | D <sup>1</sup> E <sup>8</sup> N <sup>8</sup> Q <sup>16</sup> R <sup>6</sup>                                              |
| 220K | 57.44                                              | E <sup>2</sup> N <sup>43</sup> Q <sup>5</sup> T <sup>8</sup>                | 0                                                    | -                                                                                                                        |
| 221H | 99.91                                              | D <sup>24</sup> N <sup>74</sup> P <sup>2</sup>                              | 5.4                                                  | Y <sup>5</sup>                                                                                                           |
| 222Q | 2.67                                               | L <sup>3</sup>                                                              | 0                                                    | -                                                                                                                        |
| 223K | 99.61                                              | T <sup>100</sup>                                                            | 9.2                                                  | E <sup>4</sup> Q <sup>4</sup> T <sup>1</sup>                                                                             |
| 224E | 99.34                                              | D <sup>56</sup> G <sup>43</sup> Q <sup>1</sup>                              | 1.3                                                  | D <sup>1</sup>                                                                                                           |
| 225P | 0                                                  | -                                                                           | 2                                                    | H <sup>2</sup>                                                                                                           |
| 226P | 0.02                                               | -                                                                           | 0                                                    | -                                                                                                                        |
| 227F | 97.99                                              | Y <sup>98</sup>                                                             | 2.6                                                  | L <sup>2</sup>                                                                                                           |
| 228L | 50.4                                               | I <sup>9</sup> Q <sup>28</sup> R <sup>9</sup> V <sup>3</sup>                | 22.8                                                 | H <sup>17</sup> R <sup>6</sup>                                                                                           |
| 229W | 0                                                  | -                                                                           | 0                                                    | -                                                                                                                        |
| 230M | 36.1                                               | K <sup>1</sup> L <sup>21</sup> R <sup>14</sup>                              | 0.7                                                  | L <sup>1</sup>                                                                                                           |
| 231G | 0                                                  | -                                                                           | 0                                                    | -                                                                                                                        |
| 232Y | 0.67                                               | F <sup>1</sup>                                                              | 0.1                                                  | -                                                                                                                        |
| 233E | 50.39                                              | D <sup>50</sup> V <sup>1</sup>                                              | 0                                                    | -                                                                                                                        |
| 234L | 0.13                                               | -                                                                           | 0.2                                                  | -                                                                                                                        |
| 235H | 0.95                                               | Y <sup>1</sup>                                                              | 0                                                    | -                                                                                                                        |
| 236P | 0                                                  | -                                                                           | 0.2                                                  | -                                                                                                                        |
| 237D | 0.51                                               | -                                                                           | 1.4                                                  | E <sup>1</sup>                                                                                                           |
| 238K | 66.67                                              | E <sup>1</sup> N <sup>58</sup> Q <sup>4</sup> R <sup>4</sup> T <sup>1</sup> | 2.4                                                  | T <sup>2</sup>                                                                                                           |
| 239W | 0                                                  | -                                                                           | 0                                                    | -                                                                                                                        |
| 240T | 2.43                                               | S <sup>2</sup>                                                              | 0                                                    | -                                                                                                                        |
| 241V | 96.56                                              | D <sup>97</sup>                                                             | 0.3                                                  | -                                                                                                                        |
| 242Q | 0.72                                               | E <sup>1</sup>                                                              | 2                                                    | H <sup>2</sup>                                                                                                           |
| 243P | 0.01                                               | -                                                                           | 0.7                                                  | -                                                                                                                        |
| 244I | 2.14                                               | V <sup>2</sup>                                                              | 0.4                                                  | -                                                                                                                        |
| 245V | 51.37                                              | D <sup>49</sup> I <sup>1</sup> L <sup>2</sup>                               | 31.6                                                 | E <sup>11</sup> I <sup>1</sup> K <sup>6</sup> M <sup>6</sup> Q <sup>3</sup> R <sup>1</sup> T <sup>4</sup>                |
| 246L | 0.05                                               | -                                                                           | 0                                                    | -                                                                                                                        |
| 247P | 0                                                  | -                                                                           | 0                                                    | -                                                                                                                        |
| 248E | 99.78                                              | D <sup>100</sup>                                                            | 4.2                                                  | D <sup>3</sup>                                                                                                           |
| 249K | 36.34                                              | N <sup>2</sup> Q <sup>28</sup> R <sup>2</sup> T <sup>5</sup>                | 0.8                                                  | Q <sup>1</sup>                                                                                                           |
| 250D | 0.22                                               | N <sup>6</sup> Q <sup>2</sup> T <sup>1</sup>                                | 4.3                                                  | E <sup>4</sup>                                                                                                           |

|      | Computational Model<br><i>Selective parameters</i> |                                                                              | Stanford Database<br><i>Post-inhibitor Treatment</i> |                                                                              |
|------|----------------------------------------------------|------------------------------------------------------------------------------|------------------------------------------------------|------------------------------------------------------------------------------|
|      | % Non-Native                                       | Predicted Mutations                                                          | % Non-Native                                         | Observed Mutations                                                           |
| 251S | 98.03                                              | N <sup>96</sup> T <sup>1</sup>                                               | 1.3                                                  | -                                                                            |
| 252W | 0                                                  | -                                                                            | 0                                                    | -                                                                            |
| 253T | 0.03                                               | -                                                                            | 0                                                    | -                                                                            |
| 254V | 1.19                                               | A <sup>1</sup>                                                               | 0                                                    | -                                                                            |
| 255N | 50.28                                              | D <sup>50</sup>                                                              | 0                                                    | -                                                                            |
| 256D | 0.38                                               | -                                                                            | 0                                                    | -                                                                            |
| 257I | 96.56                                              | L <sup>97</sup>                                                              | 0.7                                                  | L <sup>1</sup>                                                               |
| 258Q | 1.65                                               | E <sup>1</sup>                                                               | 0                                                    | -                                                                            |
| 259K | 85.56                                              | E <sup>50</sup> N <sup>25</sup> Q <sup>10</sup>                              | 0                                                    | -                                                                            |
| 260L | 0                                                  | -                                                                            | 0.2                                                  | -                                                                            |
| 261V | 40.24                                              | I <sup>34</sup> L <sup>6</sup>                                               | 0.1                                                  | -                                                                            |
| 262G | 99.92                                              | A <sup>99</sup> S <sup>1</sup>                                               | 0                                                    | -                                                                            |
| 263K | 11.61                                              | E <sup>5</sup> Q <sup>5</sup>                                                | 0.1                                                  | -                                                                            |
| 264L | 0                                                  | -                                                                            | 0                                                    | -                                                                            |
| 265N | 82.71                                              | D <sup>80</sup> S <sup>1</sup> T <sup>2</sup>                                | 0                                                    | -                                                                            |
| 266W | 6.74                                               | L <sup>7</sup>                                                               | 0                                                    | -                                                                            |
| 267A | 0.02                                               | -                                                                            | 0                                                    | -                                                                            |
| 268S | 0                                                  | -                                                                            | 0                                                    | -                                                                            |
| 269Q | 3.84                                               | K <sup>1</sup> L <sup>1</sup> R <sup>2</sup>                                 | 0.1                                                  | -                                                                            |
| 270I | 0.67                                               | V <sup>1</sup>                                                               | 0                                                    | -                                                                            |
| 271Y | 5.85                                               | F <sup>6</sup>                                                               | 0                                                    | -                                                                            |
| 272A | 100                                                | D <sup>1</sup> P <sup>99</sup>                                               | 55.2                                                 | P <sup>52</sup> S <sup>3</sup>                                               |
| 273G | 0                                                  | -                                                                            | 0                                                    | -                                                                            |
| 274I | 8.92                                               | L <sup>3</sup> V <sup>5</sup>                                                | 0.2                                                  | -                                                                            |
| 275K | 6.07                                               | Q <sup>1</sup> R <sup>3</sup> T <sup>2</sup>                                 | 1.9                                                  | Q <sup>1</sup> R <sup>1</sup>                                                |
| 276V | 99.98                                              | D <sup>100</sup>                                                             | 2                                                    | I <sup>1</sup> T <sup>1</sup>                                                |
| 277K | 94.99                                              | E <sup>93</sup> Q <sup>2</sup> T <sup>1</sup>                                | 31.4                                                 | R <sup>31</sup>                                                              |
| 278Q | 75.26                                              | E <sup>75</sup>                                                              | 8.5                                                  | E <sup>5</sup> H <sup>4</sup>                                                |
| 279L | 0.02                                               | -                                                                            | 0.1                                                  | -                                                                            |
| 280C | NA                                                 | NA                                                                           | NA                                                   | NA                                                                           |
| 281K | 3.78                                               | E <sup>2</sup> R <sup>1</sup>                                                | 5.5                                                  | R <sup>6</sup>                                                               |
| 282L | 0                                                  | -                                                                            | 0                                                    | -                                                                            |
| 283L | 0                                                  | -                                                                            | 7.7                                                  | I <sup>8</sup>                                                               |
| 284R | 8.67                                               | K <sup>9</sup>                                                               | 5                                                    | K <sup>5</sup>                                                               |
| 285G | 0                                                  | -                                                                            | 0                                                    | -                                                                            |
| 286T | 5.74                                               | N <sup>5</sup> S <sup>1</sup>                                                | 31.5                                                 | A <sup>30</sup> P <sup>2</sup>                                               |
| 287K | 35.3                                               | N <sup>4</sup> Q <sup>12</sup> T <sup>19</sup>                               | 0                                                    | -                                                                            |
| 288A | 89.15                                              | D <sup>12</sup> E <sup>1</sup> G <sup>3</sup> P <sup>66</sup> S <sup>7</sup> | 10.8                                                 | S <sup>9</sup> T <sup>2</sup>                                                |
| 289L | 0.04                                               | -                                                                            | 0.1                                                  | -                                                                            |
| 290T | 0.11                                               | -                                                                            | 0                                                    | -                                                                            |
| 291E | 10.8                                               | D <sup>1</sup> K <sup>10</sup> Q <sup>1</sup>                                | 3.1                                                  | D <sup>3</sup>                                                               |
| 292V | 6.46                                               | D <sup>1</sup> I <sup>6</sup>                                                | 6.7                                                  | I <sup>7</sup>                                                               |
| 293I | 90.23                                              | V <sup>90</sup>                                                              | 53.9                                                 | V <sup>54</sup>                                                              |
| 294P | 0.04                                               | -                                                                            | 8.4                                                  | A <sup>1</sup> Q <sup>2</sup> S <sup>1</sup> T <sup>4</sup>                  |
| 295L | 1.16                                               | P <sup>1</sup>                                                               | 0                                                    | -                                                                            |
| 296T | 5.86                                               | S <sup>6</sup>                                                               | 2.1                                                  | S <sup>2</sup>                                                               |
| 297E | 7.73                                               | D <sup>1</sup> K <sup>3</sup> Q <sup>3</sup>                                 | 50                                                   | A <sup>10</sup> K <sup>29</sup> Q <sup>2</sup> R <sup>7</sup> T <sup>1</sup> |
| 298E | 3.41                                               | D <sup>1</sup> K <sup>1</sup> Q <sup>1</sup>                                 | 0.6                                                  | -                                                                            |
| 299A | 0.03                                               | -                                                                            | 0                                                    | -                                                                            |
| 300E | 16.72                                              | K <sup>1</sup> Q <sup>16</sup>                                               | 0.1                                                  | -                                                                            |

|      | Computational Model<br><i>Selective parameters</i> |                                                                                            | Stanford Database<br><i>Post-inhibitor Treatment</i> |                                                                                                                          |
|------|----------------------------------------------------|--------------------------------------------------------------------------------------------|------------------------------------------------------|--------------------------------------------------------------------------------------------------------------------------|
|      | % Non-Native                                       | Predicted Mutations                                                                        | % Non-Native                                         | Observed Mutations                                                                                                       |
| 301L | 91.72                                              | I <sup>1</sup> Q <sup>14</sup> R <sup>76</sup>                                             | 1.1                                                  | I <sup>1</sup>                                                                                                           |
| 302E | 0                                                  | -                                                                                          | 0.6                                                  | D <sup>1</sup>                                                                                                           |
| 303L | 45.21                                              | F <sup>31</sup> I <sup>3</sup> R <sup>10</sup>                                             | 0.2                                                  | -                                                                                                                        |
| 304A | 43.41                                              | D <sup>11</sup> E <sup>32</sup>                                                            | 2.6                                                  | E <sup>1</sup> G <sup>2</sup>                                                                                            |
| 305E | 0.73                                               | -                                                                                          | 0.1                                                  | -                                                                                                                        |
| 306N | 0.01                                               | -                                                                                          | 0.1                                                  | -                                                                                                                        |
| 307R | 6.11                                               | K <sup>6</sup>                                                                             | 0.1                                                  | -                                                                                                                        |
| 308E | 7.08                                               | D <sup>6</sup> K <sup>1</sup> Q <sup>1</sup>                                               | 0.1                                                  | -                                                                                                                        |
| 309I | 0.16                                               | -                                                                                          | 0.2                                                  | -                                                                                                                        |
| 310L | 0                                                  | -                                                                                          | 0.2                                                  | -                                                                                                                        |
| 311K | 15.07                                              | E <sup>5</sup> Q <sup>9</sup>                                                              | 6.1                                                  | R <sup>5</sup>                                                                                                           |
| 312E | 59.47                                              | D <sup>41</sup> G <sup>18</sup> Q <sup>1</sup>                                             | 2.3                                                  | Q <sup>1</sup>                                                                                                           |
| 313P | 0.04                                               | -                                                                                          | 1.1                                                  | S <sup>1</sup>                                                                                                           |
| 314V | 0.44                                               | -                                                                                          | 0.1                                                  | -                                                                                                                        |
| 315H | 99.88                                              | D <sup>90</sup> L <sup>1</sup> N <sup>6</sup> Q <sup>1</sup> R <sup>1</sup> Y <sup>1</sup> | 0.1                                                  | -                                                                                                                        |
| 316G | 0                                                  | -                                                                                          | 0                                                    | -                                                                                                                        |
| 317V | 2.01                                               | D <sup>2</sup>                                                                             | 8.2                                                  | A <sup>8</sup>                                                                                                           |
| 318Y | 3.67                                               | F <sup>3</sup>                                                                             | 1.7                                                  | F <sup>2</sup>                                                                                                           |
| 319Y | 1.01                                               | F <sup>1</sup>                                                                             | 0.2                                                  | -                                                                                                                        |
| 320D | 0                                                  | -                                                                                          | 0.1                                                  | -                                                                                                                        |
| 321P | 0.04                                               | -                                                                                          | 0.1                                                  | -                                                                                                                        |
| 322S | 3.45                                               | T <sup>3</sup>                                                                             | 7                                                    | A <sup>1</sup> T <sup>6</sup>                                                                                            |
| 323K | 1.55                                               | Q <sup>1</sup>                                                                             | 0.1                                                  | -                                                                                                                        |
| 324D | 0.11                                               | -                                                                                          | 12.1                                                 | E <sup>12</sup>                                                                                                          |
| 325L | 0.02                                               | -                                                                                          | 0.4                                                  | -                                                                                                                        |
| 326I | 34.77                                              | F <sup>12</sup> V <sup>21</sup>                                                            | 7.3                                                  | V <sup>7</sup>                                                                                                           |
| 327A | 2.13                                               | S <sup>2</sup>                                                                             | 0.9                                                  | V <sup>1</sup>                                                                                                           |
| 328E | 0.07                                               | -                                                                                          | 0.2                                                  | -                                                                                                                        |
| 329I | 0.22                                               | -                                                                                          | 18                                                   | L <sup>11</sup> V <sup>1</sup>                                                                                           |
| 330Q | 0.36                                               | -                                                                                          | 0                                                    | -                                                                                                                        |
| 331K | 0                                                  | -                                                                                          | 0                                                    | -                                                                                                                        |
| 332Q | 1.83                                               | E <sup>1</sup> L <sup>1</sup>                                                              | 0                                                    | -                                                                                                                        |
| 333G | 0                                                  | -                                                                                          | 9.7                                                  | D <sup>1</sup> E <sup>9</sup>                                                                                            |
| 334Q | 3.66                                               | E <sup>1</sup> P <sup>2</sup>                                                              | 34.4                                                 | D <sup>2</sup> E <sup>8</sup> H <sup>4</sup> L <sup>13</sup> N <sup>3</sup> P <sup>1</sup> R <sup>1</sup> Y <sup>1</sup> |
| 335G | 0                                                  | -                                                                                          | 6                                                    | D <sup>2</sup> S <sup>4</sup>                                                                                            |
| 336Q | 4.67                                               | E <sup>3</sup> R <sup>1</sup>                                                              | 0                                                    | -                                                                                                                        |
| 337W | 0                                                  | -                                                                                          | 0                                                    | -                                                                                                                        |
| 338T | 0                                                  | -                                                                                          | 2                                                    | S <sup>2</sup>                                                                                                           |
| 339Y | 0.01                                               | -                                                                                          | 0.5                                                  | W <sup>1</sup>                                                                                                           |
| 340Q | 94.15                                              | R <sup>94</sup>                                                                            | 0                                                    | -                                                                                                                        |
| 341I | 0.02                                               | -                                                                                          | 1.2                                                  | F <sup>1</sup>                                                                                                           |
| 342Y | 0.01                                               | -                                                                                          | 0.7                                                  | F <sup>1</sup>                                                                                                           |
| 343Q | 0                                                  | -                                                                                          | 0.1                                                  | -                                                                                                                        |
| 344E | 21.67                                              | K <sup>1</sup> Q <sup>2</sup> V <sup>20</sup>                                              | 0.8                                                  | D <sup>1</sup>                                                                                                           |
| 345P | 0.25                                               | -                                                                                          | 2.5                                                  | Q <sup>2</sup>                                                                                                           |
| 346F | 26.77                                              | S <sup>3</sup> Y <sup>24</sup>                                                             | 3.9                                                  | Y <sup>4</sup>                                                                                                           |
| 347K | 2.76                                               | N <sup>2</sup>                                                                             | 0.50                                                 | -                                                                                                                        |
| 348N | 30.62                                              | D <sup>23</sup> S <sup>8</sup>                                                             | 10.2                                                 | I <sup>10</sup>                                                                                                          |
| 349L | 0                                                  | -                                                                                          | 0                                                    | -                                                                                                                        |
| 350K | 61.4                                               | E <sup>1</sup> M <sup>51</sup> Q <sup>2</sup> R <sup>4</sup> T <sup>2</sup>                | 2.7                                                  | R <sup>3</sup>                                                                                                           |

|      | Computational Model<br><i>Selective parameters</i> |                                                                                               | Stanford Database<br><i>Post-inhibitor Treatment</i> |                                                                                                           |
|------|----------------------------------------------------|-----------------------------------------------------------------------------------------------|------------------------------------------------------|-----------------------------------------------------------------------------------------------------------|
|      | % Non-Native                                       | Predicted Mutations                                                                           | % Non-Native                                         | Observed Mutations                                                                                        |
| 351T | 0                                                  | -                                                                                             | 0                                                    | -                                                                                                         |
| 352G | 0                                                  | -                                                                                             | 0                                                    | -                                                                                                         |
| 353K | 94.32                                              | E <sup>1</sup> Q <sup>2</sup> T <sup>91</sup>                                                 | 0                                                    | -                                                                                                         |
| 354Y | 0.22                                               | -                                                                                             | 0                                                    | -                                                                                                         |
| 355A | 99.98                                              | D <sup>75</sup> E <sup>2</sup> S <sup>2</sup> T <sup>14</sup> V <sup>8</sup>                  | 1.5                                                  | G <sup>1</sup>                                                                                            |
| 356R | 11.48                                              | G <sup>11</sup>                                                                               | 20.6                                                 | K <sup>21</sup>                                                                                           |
| 357M | 99.98                                              | I <sup>17</sup> K <sup>9</sup> L <sup>1</sup> R <sup>23</sup> T <sup>34</sup> V <sup>17</sup> | 31.9                                                 | A <sup>1</sup> I <sup>1</sup> K <sup>1</sup> R <sup>2</sup> S <sup>1</sup> T <sup>22</sup> V <sup>3</sup> |
| 358R | 99.36                                              | G <sup>72</sup> K <sup>27</sup>                                                               | 12.6                                                 | K <sup>13</sup>                                                                                           |
| 359G | 0                                                  | -                                                                                             | 30.7                                                 | S <sup>30</sup>                                                                                           |
| 360A | 96.71                                              | D <sup>3</sup> S <sup>92</sup> T <sup>1</sup>                                                 | 16                                                   | T <sup>11</sup> V <sup>4</sup>                                                                            |
| 361H | 99.05                                              | D <sup>81</sup> N <sup>15</sup> Y <sup>3</sup>                                                | 0                                                    | -                                                                                                         |
| 362T | 7.89                                               | N <sup>2</sup> S <sup>6</sup>                                                                 | 0.1                                                  | -                                                                                                         |
| 363N | 1.19                                               | S <sup>1</sup>                                                                                | 0                                                    | -                                                                                                         |
| 364D | 0                                                  | -                                                                                             | 0.4                                                  | -                                                                                                         |
| 365V | 0.45                                               | -                                                                                             | 6.2                                                  | I <sup>6</sup>                                                                                            |
| 366K | 3.86                                               | E <sup>2</sup> R <sup>1</sup>                                                                 | 11.4                                                 | R <sup>11</sup>                                                                                           |
| 367Q | 75.28                                              | E <sup>75</sup>                                                                               | 0.7                                                  | -                                                                                                         |
| 368L | 0                                                  | -                                                                                             | 0                                                    | -                                                                                                         |
| 369T | 4.57                                               | A <sup>4</sup>                                                                                | 9                                                    | A <sup>3</sup> V <sup>6</sup>                                                                             |
| 370E | 0.11                                               | -                                                                                             | 2.6                                                  | D <sup>2</sup>                                                                                            |
| 371A | 0.61                                               | -                                                                                             | 27.2                                                 | T <sup>1</sup> V <sup>26</sup>                                                                            |
| 372V | 0.01                                               | -                                                                                             | 0.3                                                  | -                                                                                                         |
| 373Q | 7.6                                                | E <sup>8</sup>                                                                                | 0.5                                                  | H <sup>1</sup>                                                                                            |
| 374K | 60.67                                              | E <sup>1</sup> R <sup>60</sup>                                                                | 0.4                                                  | -                                                                                                         |
| 375I | 0.01                                               | -                                                                                             | 8.3                                                  | V <sup>8</sup>                                                                                            |
| 376A | 0.45                                               | -                                                                                             | 27.3                                                 | S <sup>13</sup> T <sup>12</sup> V <sup>3</sup>                                                            |
| 377T | 91.21                                              | I <sup>41</sup> K <sup>41</sup> R <sup>10</sup>                                               | 11.9                                                 | L <sup>4</sup> M <sup>3</sup> Q <sup>3</sup> R <sup>2</sup>                                               |
| 378E | 0                                                  | -                                                                                             | 0                                                    | -                                                                                                         |
| 379S | 0                                                  | -                                                                                             | 1.8                                                  | G <sup>2</sup>                                                                                            |
| 380I | 0.11                                               | -                                                                                             | 0.1                                                  | -                                                                                                         |
| 381V | 0.52                                               | -                                                                                             | 2                                                    | I <sup>2</sup>                                                                                            |
| 382I | 1.07                                               | L <sup>1</sup>                                                                                | 0.6                                                  | -                                                                                                         |
| 383W | 0.39                                               | -                                                                                             | 0                                                    | -                                                                                                         |
| 384G | 0                                                  | -                                                                                             | 0                                                    | -                                                                                                         |
| 385K | 33.65                                              | M <sup>1</sup> N <sup>6</sup> Q <sup>1</sup> R <sup>11</sup> T <sup>14</sup>                  | 1.5                                                  | R <sup>2</sup>                                                                                            |
| 386T | 1.26                                               | P <sup>1</sup>                                                                                | 22.8                                                 | A <sup>5</sup> I <sup>16</sup> M <sup>1</sup> V <sup>1</sup>                                              |
| 387P | 0                                                  | -                                                                                             | 0                                                    | -                                                                                                         |
| 388K | 0.19                                               | -                                                                                             | 0.5                                                  | R <sup>1</sup>                                                                                            |
| 389F | 0.01                                               | -                                                                                             | 0                                                    | -                                                                                                         |
| 390K | 0.01                                               | -                                                                                             | 45.8                                                 | R <sup>46</sup>                                                                                           |
| 391L | 0                                                  | -                                                                                             | 0                                                    | -                                                                                                         |
| 392P | 0                                                  | -                                                                                             | 0                                                    | -                                                                                                         |
| 393I | 0.01                                               | -                                                                                             | 0.7                                                  | M <sup>1</sup>                                                                                            |
| 394Q | 1.42                                               | E <sup>1</sup> K <sup>1</sup>                                                                 | 1.8                                                  | L <sup>1</sup>                                                                                            |
| 395K | 3.16                                               | Q <sup>1</sup> R <sup>2</sup>                                                                 | 5.4                                                  | R <sup>5</sup>                                                                                            |
| 396E | 40.86                                              | D <sup>39</sup> Q <sup>2</sup>                                                                | 1.7                                                  | D <sup>2</sup>                                                                                            |
| 397T | 0.78                                               | I <sup>1</sup>                                                                                | 0.1                                                  | -                                                                                                         |
| 398W | 0                                                  | -                                                                                             | 0                                                    | -                                                                                                         |
| 399E | 51                                                 | D <sup>1</sup> K <sup>1</sup> Q <sup>49</sup>                                                 | 17.7                                                 | D <sup>17</sup> G <sup>1</sup>                                                                            |
| 400A | 95.49                                              | D <sup>36</sup> E <sup>2</sup> S <sup>21</sup> T <sup>36</sup>                                | 13.4                                                 | L <sup>1</sup> S <sup>6</sup> T <sup>6</sup> V <sup>1</sup>                                               |

|      | Computational Model<br><i>Selective parameters</i> |                                                              | Stanford Database<br><i>Post-inhibitor Treatment</i> |                                                             |
|------|----------------------------------------------------|--------------------------------------------------------------|------------------------------------------------------|-------------------------------------------------------------|
|      | % Non-Native                                       | Predicted Mutations                                          | % Non-Native                                         | Observed Mutations                                          |
| 401W | 0                                                  | -                                                            | 0                                                    | -                                                           |
| 402W | 0.01                                               | -                                                            | 0                                                    | -                                                           |
| 403T | 90.49                                              | K <sup>88</sup> R <sup>3</sup>                               | 4.9                                                  | M <sup>5</sup>                                              |
| 404E | 18.5                                               | D <sup>5</sup> Q <sup>13</sup>                               | 7.8                                                  | D <sup>8</sup>                                              |
| 405Y | 0.07                                               | -                                                            | 0                                                    | -                                                           |
| 406W | 0                                                  | -                                                            | 0                                                    | -                                                           |
| 407Q | 0.28                                               | -                                                            | 0                                                    | -                                                           |
| 408A | 0.2                                                | -                                                            | 0                                                    | -                                                           |
| 409T | 12.5                                               | N <sup>6</sup> S <sup>6</sup>                                | 0                                                    | -                                                           |
| 410W | 99.97                                              | G <sup>5</sup> S <sup>95</sup>                               | 0                                                    | -                                                           |
| 411I | 5.96                                               | V <sup>6</sup>                                               | 0                                                    | -                                                           |
| 412P | 0                                                  | -                                                            | 0                                                    | -                                                           |
| 413E | 3.6                                                | D <sup>3</sup>                                               | 0                                                    | -                                                           |
| 414W | 0                                                  | -                                                            | 0                                                    | -                                                           |
| 415E | 1.8                                                | V <sup>2</sup>                                               | 0                                                    | -                                                           |
| 416F | 0                                                  | -                                                            | 0                                                    | -                                                           |
| 417V | 93.37                                              | D <sup>93</sup>                                              | 0                                                    | -                                                           |
| 418N | 92.41                                              | D <sup>92</sup>                                              | 0                                                    | -                                                           |
| 419T | 9.99                                               | I <sup>8</sup> N <sup>1</sup>                                | 0                                                    | -                                                           |
| 420P | 0                                                  | -                                                            | 0                                                    | -                                                           |
| 421P | 0.05                                               | -                                                            | 0                                                    | -                                                           |
| 422L | 0                                                  | -                                                            | 0                                                    | -                                                           |
| 423V | 0.2                                                | -                                                            | 0                                                    | -                                                           |
| 424K | 96.7                                               | N <sup>81</sup> Q <sup>5</sup> R <sup>7</sup> T <sup>4</sup> | 0                                                    | -                                                           |
| 425L | 0.08                                               | -                                                            | 0                                                    | -                                                           |
| 426W | 0.1                                                | -                                                            | 0                                                    | -                                                           |
| 427Y | 0                                                  | -                                                            | 0                                                    | -                                                           |
| 428Q | 3.87                                               | E <sup>3</sup>                                               | 0                                                    | -                                                           |
| 429L | 5.88                                               | I <sup>6</sup>                                               | 0                                                    | -                                                           |
| 430E | 50.02                                              | Q <sup>50</sup>                                              | 0                                                    | -                                                           |
| 431K | 25.79                                              | E <sup>9</sup> Q <sup>16</sup>                               | 0                                                    | -                                                           |
| 432E | 18.1                                               | Q <sup>18</sup>                                              | 0                                                    | -                                                           |
| 433P | 0                                                  | -                                                            | 0                                                    | -                                                           |
| 434I | 2.02                                               | V <sup>2</sup>                                               | 0                                                    | -                                                           |
| 435V | 99.87                                              | D <sup>100</sup>                                             | 14.9                                                 | A <sup>6</sup> E <sup>2</sup> I <sup>5</sup> M <sup>2</sup> |
| 436G | 0                                                  | -                                                            | 0                                                    | -                                                           |
| 437A | 94.15                                              | S <sup>94</sup>                                              | 1.5                                                  | V <sup>2</sup>                                              |
| 438E | 0                                                  | -                                                            | 0                                                    | -                                                           |
| 439T | 0                                                  | -                                                            | 0                                                    | -                                                           |
| 440F | 0.07                                               | -                                                            | 0                                                    | -                                                           |
| 441Y | 0.01                                               | -                                                            | 0                                                    | -                                                           |
| 442V | 0                                                  | -                                                            | 0                                                    | -                                                           |
| 443D | 99.88                                              | G <sup>3</sup> H <sup>97</sup>                               | 0                                                    | -                                                           |
| 444G | 0                                                  | -                                                            | 0                                                    | -                                                           |
| 445A | 99.95                                              | E <sup>1</sup> G <sup>74</sup> S <sup>25</sup>               | 0                                                    | -                                                           |
| 446A | 65.89                                              | G <sup>59</sup> S <sup>6</sup>                               | 0                                                    | -                                                           |
| 447N | 50.01                                              | D <sup>50</sup>                                              | 0                                                    | -                                                           |
| 448R | 9.8                                                | K <sup>10</sup>                                              | 0                                                    | -                                                           |
| 449E | 75.46                                              | D <sup>75</sup> Q <sup>1</sup>                               | 0                                                    | -                                                           |
| 450T | 86.1                                               | K <sup>2</sup> N <sup>42</sup> S <sup>42</sup>               | 0                                                    | -                                                           |

|      | Computational Model<br><i>Selective parameters</i> |                                                                                | Stanford Database<br><i>Post-inhibitor Treatment</i> |                               |
|------|----------------------------------------------------|--------------------------------------------------------------------------------|------------------------------------------------------|-------------------------------|
|      | % Non-Native                                       | Predicted Mutations                                                            | % Non-Native                                         | Observed Mutations            |
| 451K | 75.33                                              | N <sup>75</sup>                                                                | 4.6                                                  | R <sup>5</sup>                |
| 452L | 2.2                                                | I <sup>1</sup> S <sup>1</sup> V <sup>1</sup>                                   | 0                                                    | -                             |
| 453G | 0                                                  | -                                                                              | 0                                                    | -                             |
| 454K | 31.3                                               | I <sup>1</sup> R <sup>7</sup> T <sup>23</sup>                                  | 0                                                    | -                             |
| 455A | 2.08                                               | T <sup>2</sup>                                                                 | 0                                                    | -                             |
| 456G | 0                                                  | -                                                                              | 0                                                    | -                             |
| 457Y | 0.22                                               | -                                                                              | 0                                                    | -                             |
| 458V | 0.68                                               | I <sup>1</sup>                                                                 | 1.5                                                  | I <sup>2</sup>                |
| 459T | 0.01                                               | -                                                                              | 0                                                    | -                             |
| 460D | 0.04                                               | -                                                                              | 22.1                                                 | N <sup>22</sup>               |
| 461R | 0.42                                               | -                                                                              | 8.5                                                  | K <sup>9</sup>                |
| 462G | 0                                                  | -                                                                              | 0                                                    | -                             |
| 463R | 95.7                                               | I <sup>91</sup> K <sup>4</sup>                                                 | 0                                                    | -                             |
| 464Q | 4.58                                               | K <sup>1</sup> R <sup>3</sup>                                                  | 0                                                    | -                             |
| 465K | 9.83                                               | R <sup>10</sup>                                                                | 0                                                    | -                             |
| 466V | 94.7                                               | D <sup>85</sup> G <sup>3</sup> I <sup>3</sup> L <sup>3</sup>                   | 2.2                                                  | A <sup>2</sup>                |
| 467V | 3.31                                               | D <sup>2</sup> I <sup>1</sup> L <sup>1</sup>                                   | 3.1                                                  | I <sup>3</sup>                |
| 468S | 55.61                                              | P <sup>11</sup> T <sup>44</sup>                                                | 6.1                                                  | P <sup>4</sup> T <sup>2</sup> |
| 469L | 15.98                                              | F <sup>16</sup>                                                                | 3.1                                                  | I <sup>3</sup>                |
| 470T | 0.04                                               | -                                                                              | 3                                                    | A <sup>2</sup> P <sup>2</sup> |
| 471D | 99.99                                              | G <sup>100</sup>                                                               | 0                                                    | -                             |
| 472T | 0.01                                               | -                                                                              | 0                                                    | -                             |
| 473T | 0.13                                               | -                                                                              | 0                                                    | -                             |
| 474N | 95.03                                              | D <sup>15</sup> I <sup>4</sup> K <sup>15</sup> S <sup>46</sup> T <sup>15</sup> | 0                                                    | -                             |
| 475Q | 27.36                                              | E <sup>3</sup> K <sup>24</sup> R <sup>1</sup>                                  | 0                                                    | -                             |
| 476K | 12.06                                              | Q <sup>1</sup> R <sup>1</sup> T <sup>10</sup>                                  | 0                                                    | -                             |
| 477T | 70.17                                              | A <sup>69</sup> R <sup>1</sup>                                                 | 0                                                    | -                             |
| 478E | 0.04                                               | -                                                                              | 0                                                    | -                             |
| 479L | 0.29                                               | -                                                                              | 0                                                    | -                             |
| 480Q | 0.93                                               | L <sup>1</sup>                                                                 | 1.5                                                  | H <sup>2</sup>                |
| 481A | 0.01                                               | --                                                                             | 0                                                    | -                             |
| 482I | 0.89                                               | L <sup>1</sup>                                                                 | 0                                                    | -                             |
| 483H | 99.98                                              | L <sup>43</sup> R <sup>57</sup>                                                | 6.4                                                  | N <sup>2</sup> Y <sup>5</sup> |
| 484L | 6.45                                               | M <sup>1</sup> Q <sup>6</sup>                                                  | 0                                                    | -                             |
| 485A | 0                                                  | -                                                                              | 0                                                    | -                             |
| 486L | 0                                                  | -                                                                              | 0                                                    | -                             |
| 487Q | 0.45                                               | -                                                                              | 0                                                    | -                             |
| 488D | 0.01                                               | -                                                                              | 0                                                    | -                             |
| 489S | 0                                                  | -                                                                              | 0                                                    | -                             |
| 490G | 5.86                                               | S <sup>6</sup>                                                                 | 0                                                    | -                             |
| 491L | 84.11                                              | S <sup>84</sup>                                                                | 0                                                    | -                             |
| 492E | 77.11                                              | K <sup>70</sup> Q <sup>8</sup>                                                 | 0                                                    | -                             |
| 493V | 64.35                                              | A <sup>2</sup> I <sup>62</sup>                                                 | 0                                                    | -                             |
| 494N | 0.21                                               | -                                                                              | 0                                                    | -                             |
| 495I | 0.01                                               | -                                                                              | 0                                                    | -                             |
| 496V | 0.04                                               | -                                                                              | 0                                                    | -                             |
| 497T | 7.92                                               | I <sup>8</sup>                                                                 | 0                                                    | -                             |
| 498D | 0.17                                               | -                                                                              | 0                                                    | -                             |
| 499S | 0                                                  | -                                                                              | 0                                                    | -                             |
| 500Q | 16.6                                               | L <sup>16</sup>                                                                | 0                                                    | -                             |

|      | Computational Model<br><i>Selective parameters</i> |                                                                              | Stanford Database<br><i>Post-inhibitor Treatment</i> |                    |
|------|----------------------------------------------------|------------------------------------------------------------------------------|------------------------------------------------------|--------------------|
|      | % Non-Native                                       | Predicted Mutations                                                          | % Non-Native                                         | Observed Mutations |
| 501Y | 39.64                                              | D <sup>1</sup> F <sup>35</sup> N <sup>4</sup>                                | 0                                                    | -                  |
| 502A | 36.82                                              | V <sup>36</sup>                                                              | 0                                                    | -                  |
| 503L | 6.67                                               | F <sup>7</sup>                                                               | 0                                                    | -                  |
| 504G | 100                                                | A <sup>1</sup> E <sup>17</sup> R <sup>13</sup> W <sup>69</sup>               | 0                                                    | -                  |
| 505I | 16.52                                              | L <sup>16</sup> V <sup>1</sup>                                               | 0                                                    | -                  |
| 506I | 63.75                                              | L <sup>63</sup>                                                              | 0                                                    | -                  |
| 507Q | 26.03                                              | E <sup>2</sup> L <sup>18</sup> R <sup>5</sup>                                | 0                                                    | -                  |
| 508A | 100                                                | D <sup>99</sup> E <sup>1</sup>                                               | 0                                                    | -                  |
| 509Q | 1.2                                                | K <sup>1</sup>                                                               | 0                                                    | -                  |
| 510P | 0                                                  | -                                                                            | 0                                                    | -                  |
| 511D | 0.51                                               | -                                                                            | 0                                                    | -                  |
| 512K | 99.99                                              | E <sup>25</sup> T <sup>75</sup>                                              | 0                                                    | -                  |
| 513S | 0.01                                               | -                                                                            | 0                                                    | -                  |
| 514E | 7                                                  | K <sup>3</sup> Q <sup>3</sup>                                                | 0                                                    | -                  |
| 515S | 50.74                                              | L <sup>1</sup> T <sup>49</sup>                                               | 0                                                    | -                  |
| 516E | 26.95                                              | D <sup>24</sup> Q <sup>3</sup>                                               | 0                                                    | -                  |
| 517L | 2.03                                               | I <sup>2</sup>                                                               | 0                                                    | -                  |
| 518V | 91.77                                              | A <sup>2</sup> D <sup>2</sup> E <sup>44</sup> I <sup>2</sup> L <sup>44</sup> | 0                                                    | -                  |
| 519S | 99.96                                              | N <sup>100</sup>                                                             | 2.4                                                  | N <sup>2</sup>     |
| 520Q | 32.17                                              | E <sup>2</sup> K <sup>22</sup> R <sup>7</sup>                                | 0                                                    | -                  |
| 521I | 0                                                  | -                                                                            | 0                                                    | -                  |
| 522I | 0.67                                               | L <sup>1</sup>                                                               | 0                                                    | -                  |
| 523E | 4.65                                               | D <sup>1</sup> Q <sup>3</sup>                                                | 0                                                    | -                  |
| 524Q | 76.75                                              | E <sup>23</sup> L <sup>53</sup>                                              | 0                                                    | -                  |
| 525L | 0                                                  | -                                                                            | 0                                                    | -                  |
| 526I | 0.18                                               | -                                                                            | 0                                                    | -                  |
| 527K | 3.07                                               | E <sup>1</sup> Q <sup>1</sup>                                                | 2.4                                                  | N <sup>2</sup>     |
| 528K | 9.8                                                | T <sup>10</sup>                                                              | 0                                                    | -                  |
| 529E | 18.12                                              | K <sup>9</sup> Q <sup>9</sup>                                                | 0                                                    | -                  |
| 530K | 9.78                                               | R <sup>10</sup>                                                              | 0                                                    | -                  |
| 531V | 0.22                                               | -                                                                            | 0                                                    | -                  |
| 532Y | 0.08                                               | -                                                                            | 0                                                    | -                  |
| 533L | 84.18                                              | F <sup>84</sup>                                                              | 0                                                    | -                  |
| 534A | 98.25                                              | S <sup>98</sup>                                                              | 0                                                    | -                  |
| 535W | 0                                                  | -                                                                            | 0                                                    | -                  |
| 536V | 50                                                 | F <sup>50</sup>                                                              | 0                                                    | -                  |
| 537P | 0                                                  | -                                                                            | 0                                                    | -                  |
| 538A | 100                                                | P <sup>99</sup>                                                              | 0                                                    | -                  |
| 539H | 99.5                                               | D <sup>2</sup> N <sup>98</sup>                                               | 0                                                    | -                  |
| 540K | 99.96                                              | N <sup>2</sup> Q <sup>3</sup> R <sup>3</sup> T <sup>93</sup>                 | 0                                                    | -                  |
| 541G | 1.16                                               | D <sup>1</sup>                                                               | 0                                                    | -                  |
| 542I | 5.72                                               | F <sup>3</sup> L <sup>2</sup> V <sup>1</sup>                                 | 0                                                    | -                  |
| 543G | 0.01                                               | -                                                                            | 0                                                    | -                  |
| 544G | 0                                                  | -                                                                            | 0                                                    | -                  |
| 545N | 99.45                                              | D <sup>2</sup> H <sup>16</sup> S <sup>41</sup> T <sup>41</sup>               | 0                                                    | -                  |
| 546E | 0.51                                               | -                                                                            | 0                                                    | -                  |
| 547Q | 0.53                                               | E <sup>1</sup>                                                               | 0                                                    | -                  |
| 548V | 97.37                                              | A <sup>97</sup>                                                              | 0                                                    | -                  |
| 549D | 50.04                                              | E <sup>50</sup>                                                              | 0                                                    | -                  |
| 550K | 92.99                                              | N <sup>6</sup> Q <sup>6</sup> R <sup>24</sup> T <sup>56</sup>                | 0                                                    | -                  |

|      | Computational Model<br><i>Selective parameters</i> |                                                                                                          | Stanford Database<br><i>Post-inhibitor Treatment</i> |                    |
|------|----------------------------------------------------|----------------------------------------------------------------------------------------------------------|------------------------------------------------------|--------------------|
|      | % Non-Native                                       | Predicted Mutations                                                                                      | % Non-Native                                         | Observed Mutations |
| 551L | 0.10                                               | -                                                                                                        | 0                                                    | -                  |
| 552V | 11.12                                              | D <sup>5</sup> I <sup>6</sup>                                                                            | 0                                                    | -                  |
| 553S | 50.71                                              | G <sup>1</sup> N <sup>49</sup>                                                                           | 0                                                    | -                  |
| 554A | 100                                                | D <sup>99</sup> S <sup>1</sup>                                                                           | 3.7                                                  | T <sup>4</sup>     |
| 555G | 0.44                                               | -                                                                                                        | 0                                                    | -                  |
| 556I | 99.90                                              | L <sup>2</sup> M <sup>2</sup> N <sup>45</sup> S <sup>2</sup> T <sup>45</sup> V <sup>5</sup>              | 0                                                    | -                  |
| 557R | 0.39                                               | -                                                                                                        | 0                                                    | -                  |
| 558K | 97.94                                              | E <sup>19</sup> N <sup>19</sup> Q <sup>2</sup> T <sup>58</sup>                                           | 0                                                    | -                  |
| 559V | 14.01                                              | E <sup>3</sup> N <sup>3</sup> Q <sup>3</sup> R <sup>3</sup> T <sup>3</sup>                               | 0                                                    | -                  |
| 560L | 30.05                                              | A <sup>4</sup> D <sup>4</sup> E <sup>4</sup> F <sup>4</sup> G <sup>4</sup> I <sup>4</sup> M <sup>4</sup> | 0                                                    | -                  |
