# Supplementary material for: Prediction of Mutational Tolerance in HIV-1 Protease and Reverse Transcriptase Using Flexible Backbone Protein Design
Source: PLoS Comput Biol. 2012 Aug 23;8(8):e1002639. doi: 10.1371/journal.pcbi.1002639 (PMC3426558; doi:10.1371/journal.pcbi.1002639)
Supplement: Table S5 — Predicted stabilization/destabilization effect of frequent major DRM combinations. Frequencies of HIV sequences that include mutation combinations with DRMs that are found in >50 sequences were obtained from the Stanford HIV database (http://hivdb.stanford.edu/pages/phenoSummary/Pheno.PI.Simple.html). The 1st and 2nd columns list the mutation combinations and sequence frequencies, respectively. Rosetta scores for these DRMs were assigned with wither “−" or “+" signs (for stabilizing (ERESFold<0) or destabilizing effects (ERESFold>0), respectively). DRMs for which our model did not provide predictions are given “?" signs. The 4th column is assigned with a positive sign in cases where a combination of predicted stabilizing and destabilizing mutations are found (corresponding to a compensation scenario). Negative signs are assigned where this is not the case (a “?" sign denotes the single case in which the compensating/non-compensating scenario could not be determined). (PDF) [file pcbi.1002639.s015.pdf]

**Table S5:** Predicted stabilization/destabilization effect of frequent major DRM combinations

| Mutation combination    | # sequences | Stabilizing/<br>destabilizing<br>(Rosetta score) | combination of<br>compensating mutations? |
|-------------------------|-------------|--------------------------------------------------|-------------------------------------------|
| 46I,90M                 | 521         | -,+                                              | +                                         |
| 54V,82A,90M             | 420         | +,+,+                                            | -                                         |
| 46I,84V,90M             | 344         | -,+,+                                            | +                                         |
| 84V,90M                 | 342         | +,+                                              | -                                         |
| 54V,82A                 | 332         | +,+                                              | -                                         |
| 46I,54V,84V,90M         | 325         | -,+,+,+                                          | +                                         |
| 46L,54V,82A             | 314         | -,+,+                                            | +                                         |
| 46L,54V,82A,90M         | 299         | -,+,+,+                                          | +                                         |
| 46I,54V,82A             | 243         | -,+,+                                            | +                                         |
| 46I,54V,82A,90M         | 219         | -,+,+,+                                          | +                                         |
| 54V,84V,90M             | 144         | +,+,+                                            | -                                         |
| 54V,90M                 | 116         | +,+                                              | -                                         |
| 30N,90M                 | 108         | -,+                                              | +                                         |
| 46L,90M                 | 94          | -,+                                              | +                                         |
| 46I,88S                 | 88          | -,+                                              | +                                         |
| 30N,46I                 | 86          | -,-                                              | -                                         |
| 46L,82A                 | 86          | -,+                                              | +                                         |
| 82A,90M                 | 79          | +,+                                              | -                                         |
| 54L,84V,90M             | 74          | ?,+,+                                            | ?                                         |
| 46I,84V                 | 73          | -,+                                              | +                                         |
| 32I,46I,82A,90M         | 67          | -,-,+,+                                          | +                                         |
| 48V,54V,82A             | 67          | +,+,+                                            | -                                         |
| 46L,54V,84V,90M         | 62          | -,+,+,+                                          | +                                         |
| 46I,47V,54V,84V,90M     | 58          | -,?,+,+,+                                        | +                                         |
| 32I,46I,47V,54M,82A,90M | 57          | -,-,?,+,+,+                                      | +                                         |
| 46I,54V,82F,90M         | 57          | -,+,+,+                                          | +                                         |
| 48V,54T,82A             | 57          | +,+,+                                            | -                                         |
| 46L,54V,82A,84V,90M     | 56          | -,+,+,+,+                                        | +                                         |
| 46L,54V,82A,84V         | 56          | -,+,+,+                                          | +                                         |
| 46I,54V,76V,82A         | 55          | -,+,+,+                                          | +                                         |
| 54V,82A,84V,90M         | 53          | +,+,+,+                                          | -                                         |
| 46I,50V,54V,82A,90M     | 52          | -,?,+,+,+                                        | +                                         |
| 48V,54V,82A,90M         | 52          | +,+,+,+                                          | -                                         |
| 46I,54V,84V             | 51          | -,+,+                                            | +                                         |
